# Supplementary material
Source: PubMed Central journal article supplement (PMC4004367)
Supplement: NIHMS550441-supplement-3.pdf [file NIHMS550441-supplement-3.pdf]

# Phillipi, Xie, et al: Supplemental Material

|           |                                                                                    |           |
|-----------|------------------------------------------------------------------------------------|-----------|
| <b>1</b>  | <b>Phenotypes and animals</b>                                                      | <b>4</b>  |
| 1.1       | Nomenclature, descriptions and transformations . . . . .                           | 4         |
| 1.2       | Gating procedure . . . . .                                                         | 5         |
| 1.3       | Mice used in the study . . . . .                                                   | 6         |
| <b>2</b>  | <b>Summary of Results</b>                                                          | <b>7</b>  |
| 2.1       | Sex and strain effects in the CC founders . . . . .                                | 7         |
| 2.2       | Diallel analysis . . . . .                                                         | 7         |
| <b>3</b>  | <b>Observed Relationships between Immunophenotypes</b>                             | <b>8</b>  |
| 3.1       | Trait correlations within populations: inbreds, F1 hybrids and the PreCC . . . . . | 8         |
| <b>4</b>  | <b>plusAPCs.Pct: Total myeloid cells (+APCs)</b>                                   | <b>9</b>  |
| 4.1       | Data collected on plusAPCs.Pct . . . . .                                           | 9         |
| 4.2       | Raw and Transformed Data . . . . .                                                 | 9         |
| 4.3       | Diallel analysis . . . . .                                                         | 10        |
| <b>5</b>  | <b>minusAPCs.Pct: Total lymphoid cells (-APCs)</b>                                 | <b>12</b> |
| 5.1       | Data collected on minusAPCs.Pct . . . . .                                          | 12        |
| 5.2       | Raw and Transformed Data . . . . .                                                 | 12        |
| 5.3       | Diallel analysis . . . . .                                                         | 13        |
| <b>6</b>  | <b>B.to.T: Ratio of B-cells to T-cells</b>                                         | <b>15</b> |
| 6.1       | Data collected on B.to.T . . . . .                                                 | 15        |
| 6.2       | Raw and Transformed Data . . . . .                                                 | 15        |
| 6.3       | Diallel analysis . . . . .                                                         | 16        |
| <b>7</b>  | <b>CD11cplus.Pct: CD11c+/CD11b- dendritic cells</b>                                | <b>18</b> |
| 7.1       | Data collected on CD11cplus.Pct . . . . .                                          | 18        |
| 7.2       | Raw and Transformed Data . . . . .                                                 | 18        |
| 7.3       | Diallel analysis . . . . .                                                         | 19        |
| <b>8</b>  | <b>CD19.Pct: Total B-cells (CD19+)</b>                                             | <b>21</b> |
| 8.1       | Data collected on CD19.Pct . . . . .                                               | 21        |
| 8.2       | Raw and Transformed Data . . . . .                                                 | 21        |
| 8.3       | Diallel analysis . . . . .                                                         | 22        |
| <b>9</b>  | <b>CD23.MFI: CD23 antigen density on all B-cells</b>                               | <b>24</b> |
| 9.1       | Data collected on CD23.MFI . . . . .                                               | 24        |
| 9.2       | Raw and Transformed Data . . . . .                                                 | 24        |
| 9.3       | Diallel analysis . . . . .                                                         | 25        |
| <b>10</b> | <b>CD25.Pct.CD4: Regulatory T-cells</b>                                            | <b>27</b> |
| 10.1      | Data collected on CD25.Pct.CD4 . . . . .                                           | 27        |
| 10.2      | Raw and Transformed Data . . . . .                                                 | 27        |
| 10.3      | Diallel analysis . . . . .                                                         | 28        |

|                                                                    |           |
|--------------------------------------------------------------------|-----------|
| <b>11 CD4.Pct.H57: Helper and regulatory T-cells</b>               | <b>30</b> |
| 11.1 Data collected on CD4.Pct.H57                                 | 30        |
| 11.2 Raw and Transformed Data                                      | 30        |
| 11.3 Diallel analysis                                              | 31        |
| <b>12 CD4.to.CD8: Ratio of helper T-cells to cytotoxic T-cells</b> | <b>33</b> |
| 12.1 Data collected on CD4.to.CD8                                  | 33        |
| 12.2 Raw and Transformed Data                                      | 33        |
| 12.3 Diallel analysis                                              | 34        |
| <b>13 CD8.Pct.H57: Cytotoxic T-cells</b>                           | <b>36</b> |
| 13.1 Data collected on CD8.Pct.H57                                 | 36        |
| 13.2 Raw and Transformed Data                                      | 36        |
| 13.3 Diallel analysis                                              | 37        |
| <b>14 DCs.CD11b.MFI: CD11b antigen density on dendritic cells</b>  | <b>39</b> |
| 14.1 Data collected on DCs.CD11b.MFI                               | 39        |
| 14.2 Raw and Transformed Data                                      | 39        |
| 14.3 Diallel analysis                                              | 40        |
| <b>15 DCs.CD11c.MFI: CD11c antigen density on dendritic cells</b>  | <b>42</b> |
| 15.1 Data collected on DCs.CD11c.MFI                               | 42        |
| 15.2 Raw and Transformed Data                                      | 42        |
| 15.3 Diallel analysis                                              | 43        |
| <b>16 DCs.Pct: Classical dendritic cells</b>                       | <b>45</b> |
| 16.1 Data collected on DCs.Pct                                     | 45        |
| 16.2 Raw and Transformed Data                                      | 45        |
| 16.3 Diallel analysis                                              | 46        |
| <b>17 FoB.Pct.CD19: Follicular B-cells (CD19+)</b>                 | <b>48</b> |
| 17.1 Data collected on FoB.Pct.CD19                                | 48        |
| 17.2 Raw and Transformed Data                                      | 48        |
| 17.3 Diallel analysis                                              | 49        |
| <b>18 Granulocytes.Pct: Granulocytes</b>                           | <b>51</b> |
| 18.1 Data collected on Granulocytes.Pct                            | 51        |
| 18.2 Raw and Transformed Data                                      | 51        |
| 18.3 Diallel analysis                                              | 52        |
| <b>19 H57.Pct: Total T-cells (H57+)</b>                            | <b>54</b> |
| 19.1 Data collected on H57.Pct                                     | 54        |
| 19.2 Raw and Transformed Data                                      | 54        |
| 19.3 Diallel analysis                                              | 55        |
| <b>20 Macrophages.Pct: Macrophages</b>                             | <b>57</b> |
| 20.1 Data collected on Macrophages.Pct                             | 57        |
| 20.2 Raw and Transformed Data                                      | 57        |
| 20.3 Diallel analysis                                              | 58        |
| <b>21 Monocytes.Pct: Monocytes</b>                                 | <b>60</b> |
| 21.1 Data collected on Monocytes.Pct                               | 60        |
| 21.2 Raw and Transformed Data                                      | 60        |
| 21.3 Diallel analysis                                              | 61        |

|                                                  |           |
|--------------------------------------------------|-----------|
| <b>22 Phagocytes.Pct: Phagocytes (CD11b Hi)</b>  | <b>63</b> |
| 22.1 Data collected on Phagocytes.Pct . . . . .  | 63        |
| 22.2 Raw and Transformed Data . . . . .          | 63        |
| 22.3 Diallel analysis . . . . .                  | 64        |
| <b>23 MZB.Pct.CD19: Marginal Zone B-cells</b>    | <b>66</b> |
| 23.1 Data collected on MZB.Pct.CD19 . . . . .    | 66        |
| 23.2 Raw and Transformed Data . . . . .          | 66        |
| 23.3 Diallel analysis . . . . .                  | 67        |
| <b>24 TransB.Pct.CD19: Transitional B-cells</b>  | <b>69</b> |
| 24.1 Data collected on TransB.Pct.CD19 . . . . . | 69        |
| 24.2 Raw and Transformed Data . . . . .          | 69        |
| 24.3 Diallel analysis . . . . .                  | 70        |

# Chapter 1

## Phenotypes and animals

### 1.1 Nomenclature, descriptions and transformations

Table 1.1: Phenotype names and transformations used in this document.

| Name in analysis | Name in manuscript | Description                                  | Transformation |
|------------------|--------------------|----------------------------------------------|----------------|
| plusAPCs.Pct     | +APCs              | Total myeloid cells (+APCs)                  | logit          |
| minusAPCs.Pct    | -APCs              | Total lymphoid cells (-APCs)                 | logit          |
| B.to.T           | B/T                | Ratio of B-cells to T-cells                  | log10          |
| CD11cplus.Pct    | CD11c+             | CD11c+/CD11b- dendritic cells                | logit          |
| CD19.Pct         | CD19+              | Total B-cells (CD19+)                        | logit          |
| CD23.MFI         | CD23 MFI           | CD23 antigen density on all B-cells          | log10          |
| CD25.Pct.CD4     | CD25+              | Regulatory T-cells                           | logit          |
| CD4.Pct.H57      | CD4+               | Helper and regulatory T-cells                | logit          |
| CD4.to.CD8       | CD4+/CD8+          | Ratio of helper T-cells to cytotoxic T-cells | log10          |
| CD8.Pct.H57      | CD8+               | Cytotoxic T-cells                            | logit          |
| DCs.CD11b.MFI    | CD11b MFI          | CD11b antigen density on dendritic cells     | log10          |
| DCs.CD11c.MFI    | CD11c MFI          | CD11c antigen density on dendritic cells     | log10          |
| DCs.Pct          | DCs                | Classical dendritic cells                    | logit          |
| FoB.Pct.CD19     | FoB                | Follicular B-cells (CD19+)                   | INT            |
| Granulocytes.Pct | Granulocytes       | Granulocytes                                 | logit          |
| H57.Pct          | H57+               | Total T-cells (H57+)                         | logit          |
| Macrophages.Pct  | Macrophages        | Macrophages                                  | logit          |
| Monocytes.Pct    | Monocytes          | Monocytes                                    | logit          |
| Phagocytes.Pct   | CD11b Hi           | Phagocytes (CD11b Hi)                        | logit          |
| MZB.Pct.CD19     | MZB                | Marginal Zone B-cells                        | INT            |
| TransB.Pct.CD19  | TransB             | Transitional B-cells                         | INT            |

## 1.2 Gating procedure

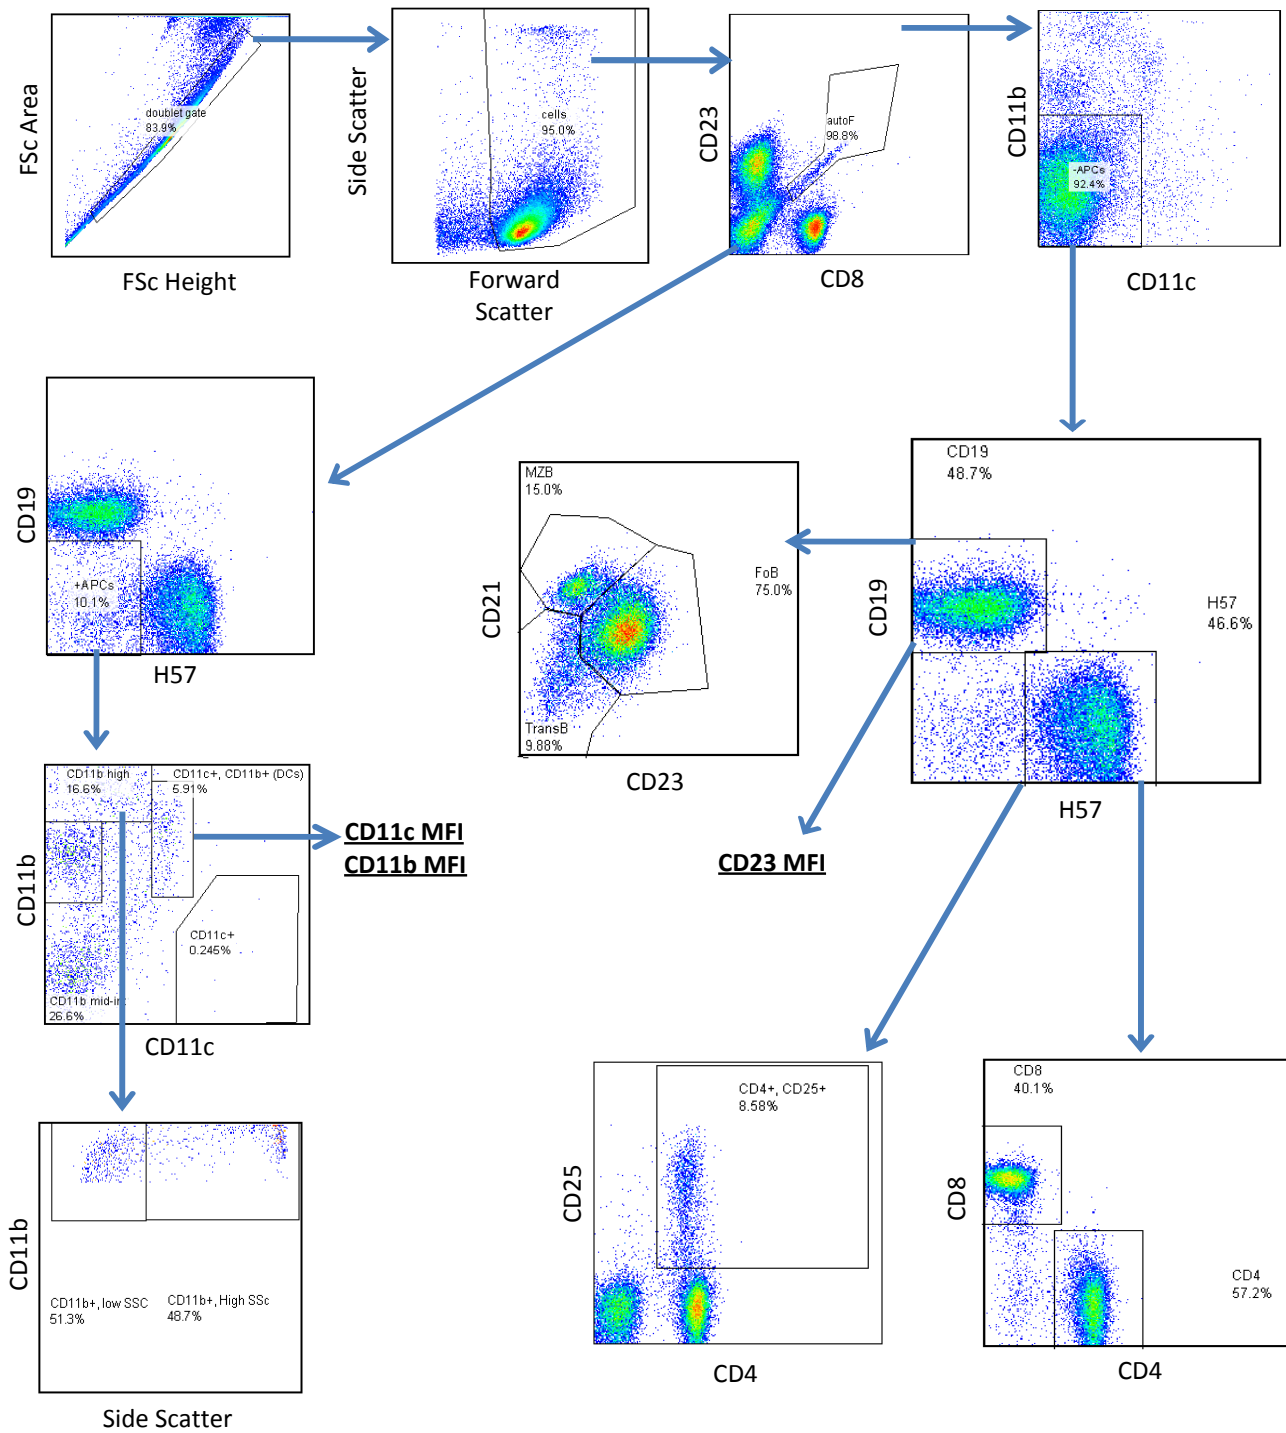

Figure 1.1: Example gating scheme on B6 control spleen

### 1.3 Mice used in the study

Table 1.2: Number of mice measured. Each strain columns show the number of females, males, and (where applicable) mice for which sex data was unavailable.

| Phenotype        | AJ   | B6       | 129  | NOD  | NZO   | CAST | PWK  | WSB  | F1     | PreCC |
|------------------|------|----------|------|------|-------|------|------|------|--------|-------|
| plusAPCs.Pct     | 4, 2 | 4, 6, 62 | 4, 2 | 0, 6 | 0, 10 | 0, 2 | 3, 6 | 2, 8 | 51, 81 | 0, 66 |
| minusAPCs.Pct    | 4, 2 | 4, 6, 62 | 4, 2 | 0, 6 | 0, 10 | 0, 2 | 3, 6 | 2, 8 | 51, 81 | 0, 66 |
| B.to.T           | 4, 2 | 4, 6, 62 | 4, 2 | 0, 6 | 0, 10 | 0, 2 | 3, 6 | 2, 8 | 51, 81 | 0, 66 |
| CD11cplus.Pct    | 4, 2 | 4, 6, 61 | 4, 2 | 0, 6 | 0, 10 | 0, 2 | 3, 6 | 2, 8 | 51, 81 | 0, 54 |
| CD19.Pct         | 4, 2 | 4, 6, 62 | 4, 2 | 0, 6 | 0, 10 | 0, 2 | 3, 6 | 2, 8 | 51, 81 | 0, 66 |
| CD23.MFI         | 4, 2 | 4, 6, 62 | 4, 2 | 0, 6 | 0, 10 | 0, 2 | 3, 6 | 2, 8 | 51, 81 | 0, 66 |
| CD25.Pct.CD4     | 4, 2 | 4, 6, 58 | 4, 2 | 0, 6 | 0, 10 | 0, 2 | 3, 6 | 2, 8 | 51, 81 | 0, 66 |
| CD4.Pct.H57      | 4, 2 | 4, 6, 62 | 4, 2 | 0, 6 | 0, 10 | 0, 2 | 3, 6 | 2, 8 | 51, 81 | 0, 66 |
| CD4.to.CD8       | 4, 2 | 4, 6, 62 | 4, 2 | 0, 6 | 0, 10 | 0, 2 | 3, 6 | 2, 8 | 51, 81 | 0, 66 |
| CD8.Pct.H57      | 4, 2 | 4, 6, 62 | 4, 2 | 0, 6 | 0, 10 | 0, 2 | 3, 6 | 2, 8 | 51, 81 | 0, 66 |
| DCs.CD11b.MFI    | 4, 2 | 4, 6, 61 | 4, 2 | 0, 6 | 0, 10 | 0, 2 | 3, 6 | 2, 8 | 51, 81 | 0, 54 |
| DCs.CD11c.MFI    | 4, 2 | 4, 6, 61 | 4, 2 | 0, 6 | 0, 10 | 0, 2 | 3, 6 | 2, 8 | 51, 81 | 0, 54 |
| DCs.Pct          | 4, 2 | 4, 6, 61 | 4, 2 | 0, 6 | 0, 10 | 0, 2 | 3, 6 | 2, 8 | 51, 81 | 0, 54 |
| FoB.Pct.CD19     | 4, 2 | 4, 6, 58 | 4, 2 | 0, 6 | 0, 10 | 0, 2 | 3, 6 | 2, 8 | 51, 81 | 0, 40 |
| Granulocytes.Pct | 4, 2 | 4, 6, 61 | 4, 2 | 0, 6 | 0, 10 | 0, 2 | 3, 6 | 2, 8 | 51, 81 | 0, 54 |
| H57.Pct          | 4, 2 | 4, 6, 62 | 4, 2 | 0, 6 | 0, 10 | 0, 2 | 3, 6 | 2, 8 | 51, 81 | 0, 66 |
| Macrophages.Pct  | 4, 2 | 4, 6, 61 | 4, 2 | 0, 6 | 0, 10 | 0, 2 | 3, 6 | 2, 8 | 51, 81 | 0, 54 |
| Monocytes.Pct    | 4, 2 | 4, 6, 61 | 4, 2 | 0, 6 | 0, 10 | 0, 2 | 3, 6 | 2, 8 | 51, 81 | 0, 54 |
| Phagocytes.Pct   | 4, 2 | 4, 6, 61 | 4, 2 | 0, 6 | 0, 10 | 0, 2 | 3, 6 | 2, 8 | 51, 81 | 0, 54 |
| MZB.Pct.CD19     | 4, 2 | 4, 6, 58 | 4, 2 | 0, 6 | 0, 10 | 0, 2 | 3, 6 | 2, 8 | 51, 81 | 0, 40 |
| TransB.Pct.CD19  | 4, 2 | 4, 6, 58 | 4, 2 | 0, 6 | 0, 10 | 0, 2 | 3, 6 | 2, 8 | 51, 81 | 0, 40 |

# Chapter 2

## Summary of Results

### 2.1 Sex and strain effects in the CC founders

Table 2.1: Significance of sex and strain effects on 21 phenotypes in the CC founders. These are calculated using a mixed model that controls for batch as a random effect.

| Phenotype        | Sex.Effect.Pval | Strain.Effect.Pval |
|------------------|-----------------|--------------------|
| plusAPCs.Pct     | 3.63e-07        | 9.58e-05           |
| minusAPCs.Pct    | 0.00131         | 0.00144            |
| B.to.T           | 0.000121        | 3.44e-05           |
| CD11cplus.Pct    | 0.595           | 0.0785             |
| CD19.Pct         | 0.0137          | 0.00179            |
| CD23.MFI         | 0.0108          | 6.1e-09            |
| CD25.Pct.CD4     | 2.73e-05        | 8.15e-06           |
| CD4.Pct.H57      | 0.588           | 1.97e-06           |
| CD4.to.CD8       | 2.34e-05        | 4.91e-05           |
| CD8.Pct.H57      | 5.56e-08        | 0.000242           |
| DCs.CD11b.MFI    | 0.166           | 0.00024            |
| DCs.CD11c.MFI    | 0.00204         | 1.13e-11           |
| DCs.Pct          | 0.0846          | 1.31e-09           |
| FoB.Pct.CD19     | 0.127           | 7.88e-07           |
| Granulocytes.Pct | 7.23e-05        | 0.0381             |
| H57.Pct          | 1.91e-07        | 0.000195           |
| Macrophages.Pct  | 0.579           | 4.63e-05           |
| Monocytes.Pct    | 0.00971         | 1.6e-07            |
| Phagocytes.Pct   | 0.0373          | 0.00275            |
| MZB.Pct.CD19     | 0.444           | 2.56e-10           |
| TransB.Pct.CD19  | 0.443           | 4.45e-05           |

### 2.2 Diallel analysis

The diallel analysis was confounded by batch effects. Examination of individual phenotypes reveals that, when accounting for uncertainty due to batch, posteriors for most effects in most phenotypes are extremely vague and cover zero.

## Chapter 3

# Observed Relationships between Immunophenotypes

### 3.1 Trait correlations within populations: inbreds, F1 hybrids and the PreCC

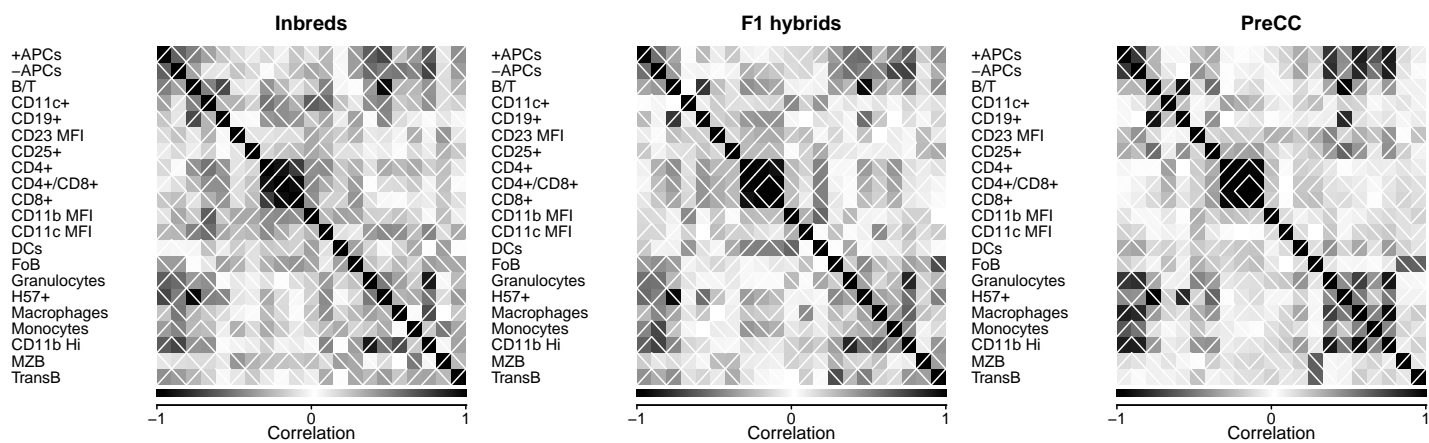

Figure 3.1: Correlations among phenotypes. Each block represents the correlation between two (transformed) phenotypes, with the top-left to bottom-right diagonal of black blocks depicting correlation of +1 (ie, a phenotype with itself). Shading indicates strength of correlation; white diagonal lines indicate positive vs negative correlation. Black crosses indicate missing data.



# Chapter 4

## plusAPCs.Pct: Total myeloid cells (+APCs)

### 4.1 Data collected on plusAPCs.Pct

Description: Total myeloid cells (+APCs)

Transformation: logit. Rationale for transformation: Natural range is a proportion between 0 and 1, so logit transformation provides an interpretable scale for effects.

Table 4.1: Number of mice phenotyped for plusAPCs.Pct

|         | AJ | B6 | 129S1 | NOD | NZO | CAST | PWK | WSB | F1  | PreCC | Total |
|---------|----|----|-------|-----|-----|------|-----|-----|-----|-------|-------|
| Female  | 4  | 4  | 4     | 0   | 0   | 0    | 3   | 2   | 51  | 0     | 68    |
| Male    | 2  | 6  | 2     | 6   | 10  | 2    | 6   | 8   | 81  | 66    | 189   |
| Unsexed | 0  | 62 | 0     | 0   | 0   | 0    | 0   | 0   | 0   | 0     | 62    |
| Total   | 6  | 72 | 6     | 6   | 10  | 2    | 9   | 10  | 132 | 66    | 319   |

### 4.2 Raw and Transformed Data

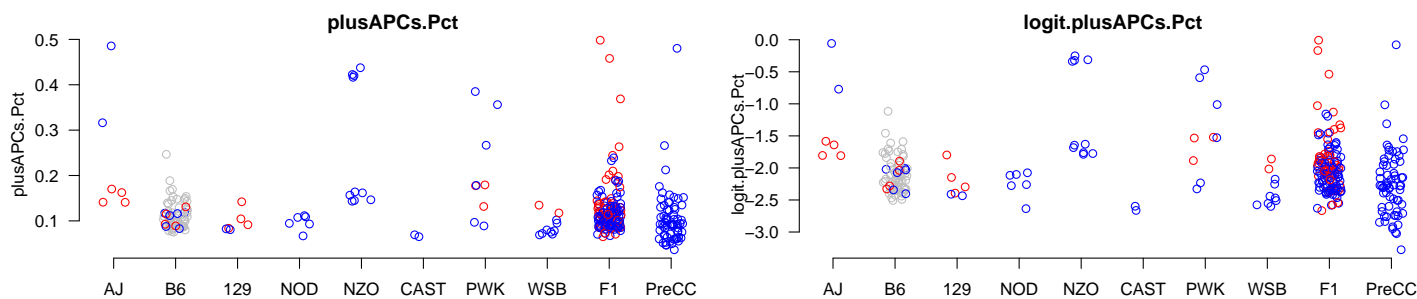

Figure 4.1: Phenotype values: raw and transformed for analysis for founder, F1 hybrid and PreCC mice. Colors distinguish females (red), males (blue), and unsexed (gray) mice.

Table 4.2: Point estimates. Upper table portion: mean and range statistics for raw phenotype values. Lower table portion: strain means and 95% CI on the transformed scale, as estimated from a linear model that includes a random intercept modeling the effects of 57 batches.

|                     | AJ     | B6      | 129S1   | NOD     | NZO    | CAST    | PWK    | WSB     | F1      | PreCC   |
|---------------------|--------|---------|---------|---------|--------|---------|--------|---------|---------|---------|
| Mean                | 0.236  | 0.111   | 0.0975  | 0.0971  | 0.261  | 0.0672  | 0.207  | 0.0895  | 0.127   | 0.105   |
| SE of Mean          | 0.0567 | 0.00348 | 0.00962 | 0.00681 | 0.0444 | 0.00205 | 0.0357 | 0.00708 | 0.00536 | 0.00771 |
| Min                 | 0.141  | 0.0753  | 0.0806  | 0.0669  | 0.143  | 0.0652  | 0.0889 | 0.0691  | 0.065   | 0.0364  |
| Max                 | 0.486  | 0.247   | 0.142   | 0.112   | 0.438  | 0.0693  | 0.385  | 0.135   | 0.498   | 0.48    |
| Modeled 95%CI Lower | -1.56  | -2.22   | -2.34   | -2.5    | -1.45  | -2.98   | -1.9   | -2.62   | -2.05   | -2.41   |
| Modeled Mean        | -1.23  | -2.11   | -2.01   | -2.1    | -1.17  | -2.42   | -1.58  | -2.36   | -1.95   | -2.24   |
| Modeled 95%CI Upper | -0.892 | -2      | -1.69   | -1.71   | -0.891 | -1.86   | -1.26  | -2.09   | -1.85   | -2.07   |

Table 4.3: Sequential ANOVA table of strain and sex effects, controlling for batch, in the sexed subset of tested inbred strains.

|               | numerator df | denominator df | F-value | p-value  |
|---------------|--------------|----------------|---------|----------|
| Sex           | 1            | 38             | 37.7    | 3.63e-07 |
| Inbred Strain | 7            | 38             | 5.99    | 9.58e-05 |

### 4.3 Diallel analysis

Diallel analysis including batch effects and Bayesian imputation of missing sex assignments was performed as described in Methods. This diallel arose as a byproduct of another experiment, and suboptimal pairing of batches with F1 hybrid groups in the experimental design means that incorporating batch effects greatly increases uncertainty about estimated genetic parameters.

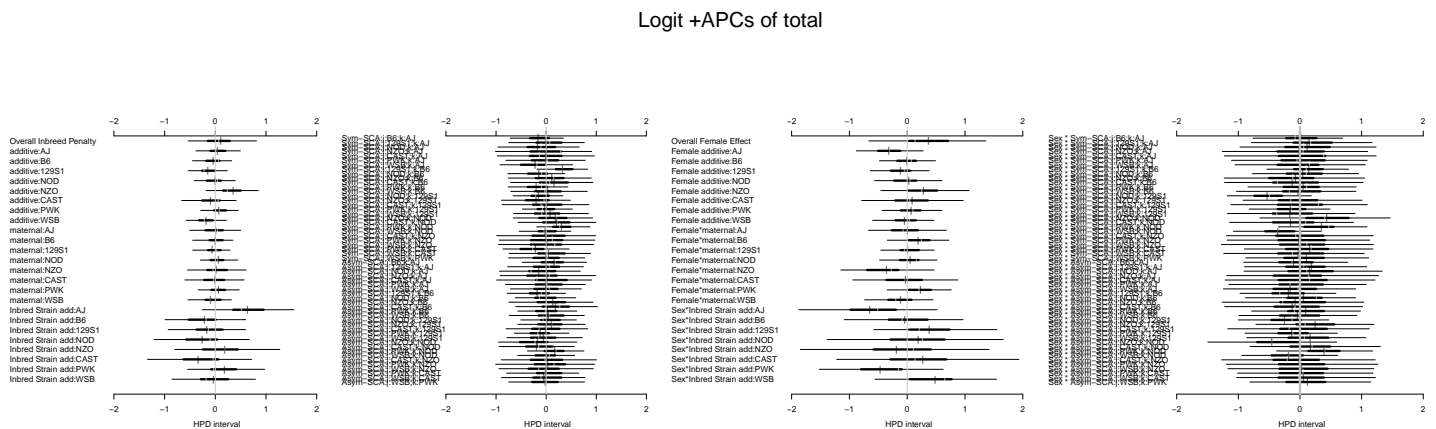

Figure 4.2: Diallel effects based on the normal model **without** accounting for batch effects on the phenotype under a logit transformation.

Logit +APCs of total

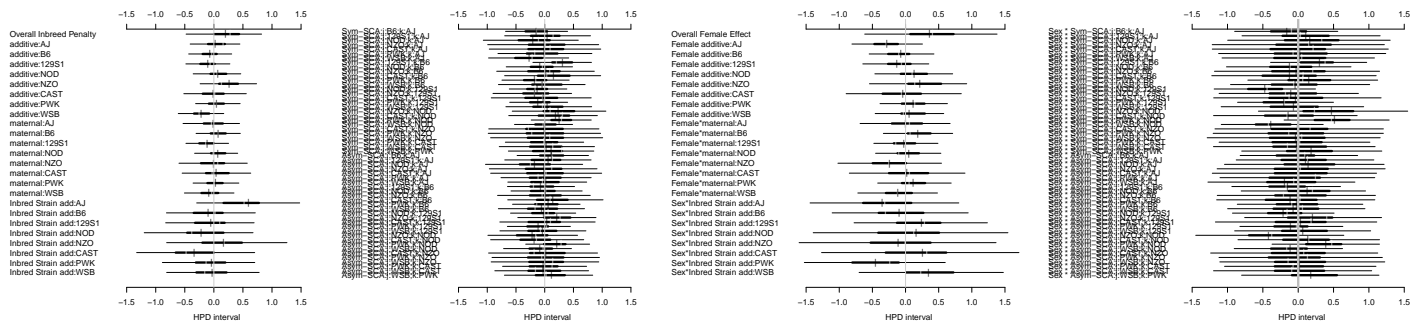

Figure 4.3: Diallel effects based on the normal model **accounting for batch effects** on the phenotype under a logit transformation.

# Chapter 5

## minusAPCs.Pct: Total lymphoid cells (-APCs)

### 5.1 Data collected on minusAPCs.Pct

Description: Total lymphoid cells (-APCs)

Transformation: logit. Rationale for transformation: Natural range is a proportion between 0 and 1, so logit transformation provides an interpretable scale for effects.

Table 5.1: Number of mice phenotyped for minusAPCs.Pct

|         | AJ | B6 | 129S1 | NOD | NZO | CAST | PWK | WSB | F1  | PreCC | Total |
|---------|----|----|-------|-----|-----|------|-----|-----|-----|-------|-------|
| Female  | 4  | 4  | 4     | 0   | 0   | 0    | 3   | 2   | 51  | 0     | 68    |
| Male    | 2  | 6  | 2     | 6   | 10  | 2    | 6   | 8   | 81  | 66    | 189   |
| Unsexed | 0  | 62 | 0     | 0   | 0   | 0    | 0   | 0   | 0   | 0     | 62    |
| Total   | 6  | 72 | 6     | 6   | 10  | 2    | 9   | 10  | 132 | 66    | 319   |

### 5.2 Raw and Transformed Data

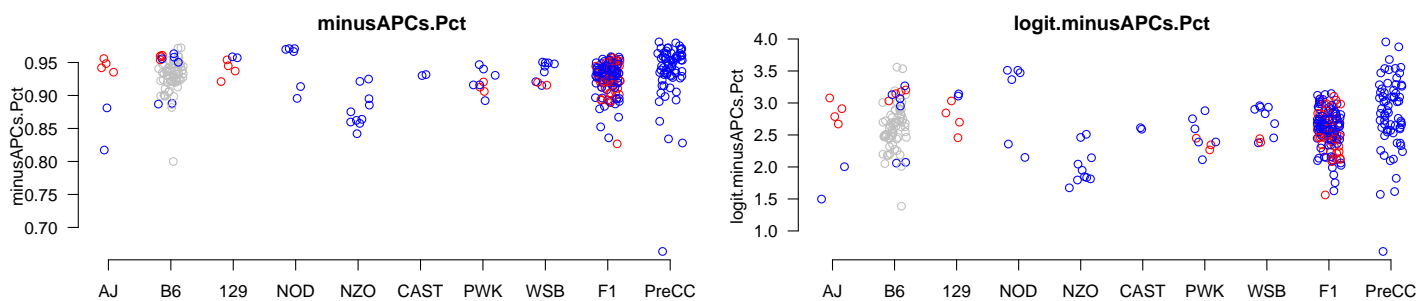

Figure 5.1: Phenotype values: raw and transformed for analysis for founder, F1 hybrid and PreCC mice. Colors distinguish females (red), males (blue), and unsexed (gray) mice.

Table 5.2: Point estimates. Upper table portion: mean and range statistics for raw phenotype values. Lower table portion: strain means and 95% CI on the transformed scale, as estimated from a linear model that includes a random intercept modeling the effects of 57 batches.

|                     | AJ     | B6      | 129S1   | NOD    | NZO     | CAST    | PWK     | WSB     | F1      | PreCC   |
|---------------------|--------|---------|---------|--------|---------|---------|---------|---------|---------|---------|
| Mean                | 0.913  | 0.93    | 0.945   | 0.948  | 0.879   | 0.931   | 0.92    | 0.935   | 0.926   | 0.936   |
| SE of Mean          | 0.0221 | 0.00307 | 0.00591 | 0.0139 | 0.00876 | 0.00075 | 0.00564 | 0.00485 | 0.00206 | 0.00564 |
| Min                 | 0.817  | 0.8     | 0.921   | 0.896  | 0.842   | 0.93    | 0.892   | 0.915   | 0.827   | 0.664   |
| Max                 | 0.956  | 0.972   | 0.959   | 0.971  | 0.925   | 0.932   | 0.947   | 0.951   | 0.959   | 0.981   |
| Modeled 95%CI Lower | 2.11   | 2.52    | 2.36    | 2.58   | 2.02    | 1.95    | 2.21    | 2.59    | 2.47    | 2.67    |
| Modeled Mean        | 2.42   | 2.62    | 2.66    | 2.94   | 2.28    | 2.47    | 2.51    | 2.84    | 2.56    | 2.83    |
| Modeled 95%CI Upper | 2.73   | 2.72    | 2.96    | 3.3    | 2.53    | 2.99    | 2.8     | 3.08    | 2.66    | 2.98    |

Table 5.3: Sequential ANOVA table of strain and sex effects, controlling for batch, in the sexed subset of tested inbred strains.

|               | numerator df | denominator df | F-value | p-value |
|---------------|--------------|----------------|---------|---------|
| Sex           | 1            | 38             | 12      | 0.00131 |
| Inbred Strain | 7            | 38             | 4.28    | 0.00144 |

### 5.3 Diallel analysis

Diallel analysis including batch effects and Bayesian imputation of missing sex assignments was performed as described in Methods. This diallel arose as a byproduct of another experiment, and suboptimal pairing of batches with F1 hybrid groups in the experimental design means that incorporating batch effects greatly increases uncertainty about estimated genetic parameters.

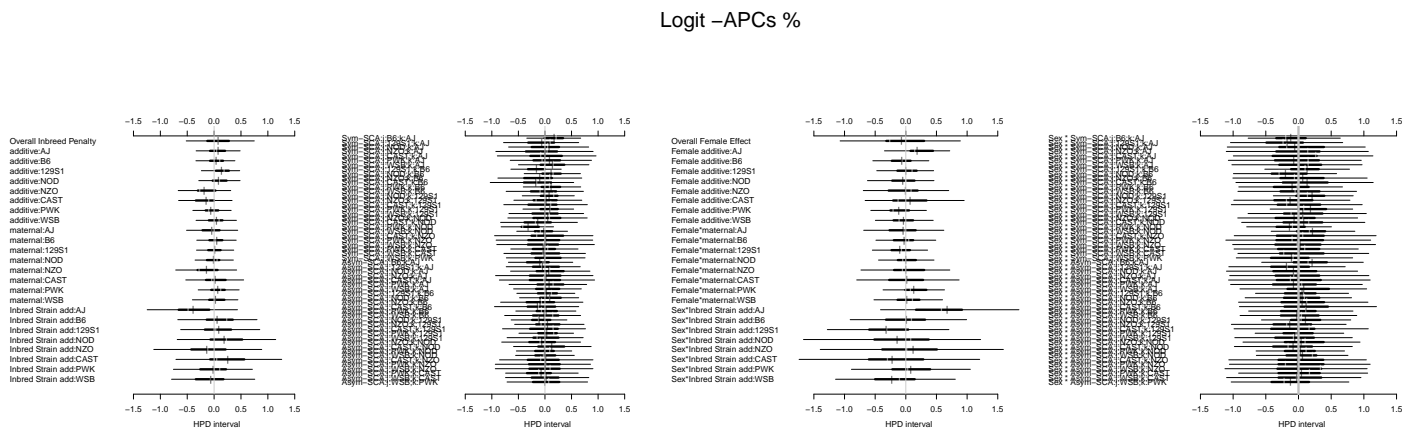

Figure 5.2: Diallel effects based on the normal model **without** accounting for batch effects on the phenotype under a logit transformation.

Logit -APCs %

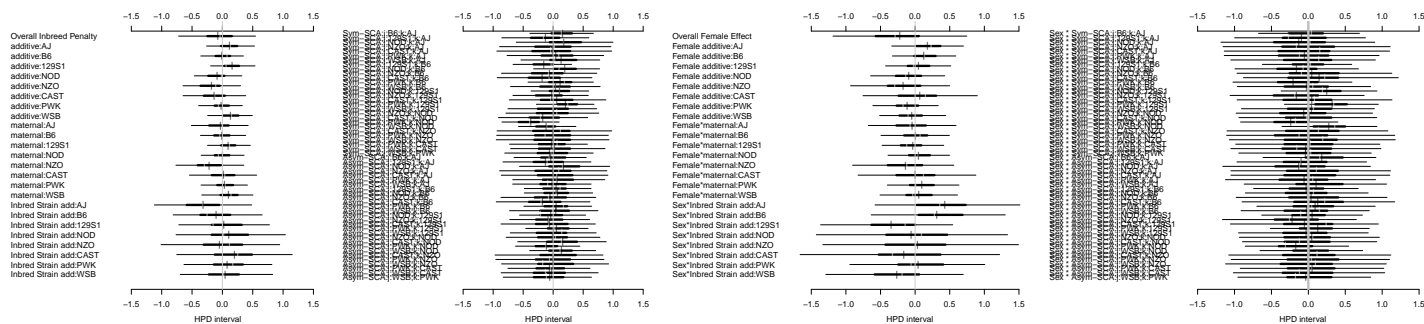

Figure 5.3: Diallel effects based on the normal model **accounting for batch effects** on the phenotype under a logit transformation.

# Chapter 6

## B.to.T: Ratio of B-cells to T-cells

### 6.1 Data collected on B.to.T

Description: Ratio of B-cells to T-cells

Transformation:  $\log_{10}$ . Rationale for transformation: Ratio quantity and therefore highly skewed. Logarithmic transformation brings it onto an additive, symmetric scale. Log to base 10 ( $\log_{10}$ ) is used to provide a more interpretable scale for the effects.

Table 6.1: Number of mice phenotyped for B.to.T

|         | AJ | B6 | 129S1 | NOD | NZO | CAST | PWK | WSB | F1  | PreCC | Total |
|---------|----|----|-------|-----|-----|------|-----|-----|-----|-------|-------|
| Female  | 4  | 4  | 4     | 0   | 0   | 0    | 3   | 2   | 51  | 0     | 68    |
| Male    | 2  | 6  | 2     | 6   | 10  | 2    | 6   | 8   | 81  | 66    | 189   |
| Unsexed | 0  | 62 | 0     | 0   | 0   | 0    | 0   | 0   | 0   | 0     | 62    |
| Total   | 6  | 72 | 6     | 6   | 10  | 2    | 9   | 10  | 132 | 66    | 319   |

### 6.2 Raw and Transformed Data

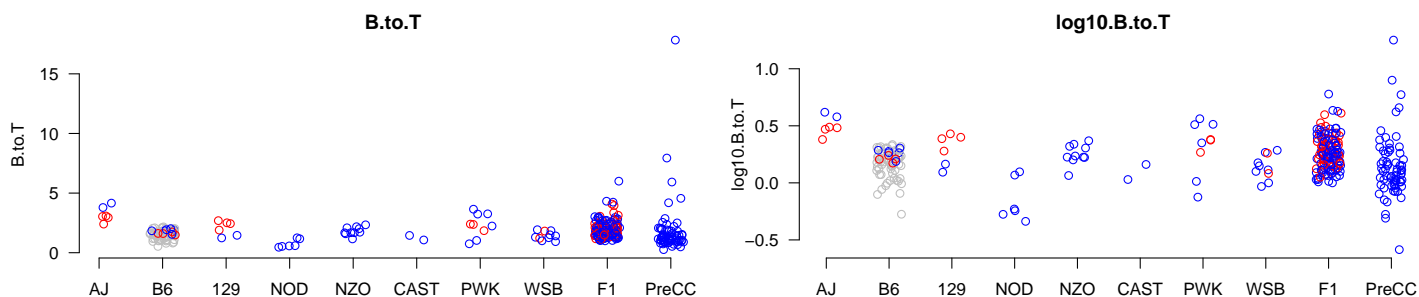

Figure 6.1: Phenotype values: raw and transformed for analysis for founder, F1 hybrid and PreCC mice. Colors distinguish females (red), males (blue), and unsexed (gray) mice.

Table 6.2: Point estimates. Upper table portion: mean and range statistics for raw phenotype values. Lower table portion: strain means and 95% CI on the transformed scale, as estimated from a linear model that includes a random intercept modeling the effects of 57 batches.

|                     | AJ    | B6    | 129S1 | NOD     | NZO    | CAST    | PWK   | WSB    | F1     | PreCC  |
|---------------------|-------|-------|-------|---------|--------|---------|-------|--------|--------|--------|
| Mean                | 3.24  | 1.55  | 2.04  | 0.762   | 1.81   | 1.26    | 2.31  | 1.42   | 1.97   | 1.83   |
| SE of Mean          | 0.258 | 0.043 | 0.245 | 0.143   | 0.109  | 0.19    | 0.33  | 0.111  | 0.0665 | 0.288  |
| Min                 | 2.4   | 0.531 | 1.24  | 0.46    | 1.16   | 1.07    | 0.75  | 0.93   | 1      | 0.26   |
| Max                 | 4.16  | 2.17  | 2.69  | 1.25    | 2.34   | 1.45    | 3.65  | 1.93   | 6      | 17.8   |
| Modeled 95%CI Lower | 0.378 | 0.127 | 0.228 | -0.315  | 0.0791 | 0.00443 | 0.182 | 0.0449 | 0.235  | 0.0995 |
| Modeled Mean        | 0.522 | 0.171 | 0.371 | -0.155  | 0.197  | 0.248   | 0.313 | 0.158  | 0.273  | 0.165  |
| Modeled 95%CI Upper | 0.667 | 0.214 | 0.514 | 0.00497 | 0.315  | 0.492   | 0.443 | 0.271  | 0.312  | 0.23   |

Table 6.3: Sequential ANOVA table of strain and sex effects, controlling for batch, in the sexed subset of tested inbred strains.

|               | numerator df | denominator df | F-value | p-value  |
|---------------|--------------|----------------|---------|----------|
| Sex           | 1            | 38             | 18.3    | 0.000121 |
| Inbred Strain | 7            | 38             | 6.7     | 3.44e-05 |

### 6.3 Diallel analysis

Diallel analysis including batch effects and Bayesian imputation of missing sex assignments was performed as described in Methods. This diallel arose as a byproduct of another experiment, and suboptimal pairing of batches with F1 hybrid groups in the experimental design means that incorporating batch effects greatly increases uncertainty about estimated genetic parameters.

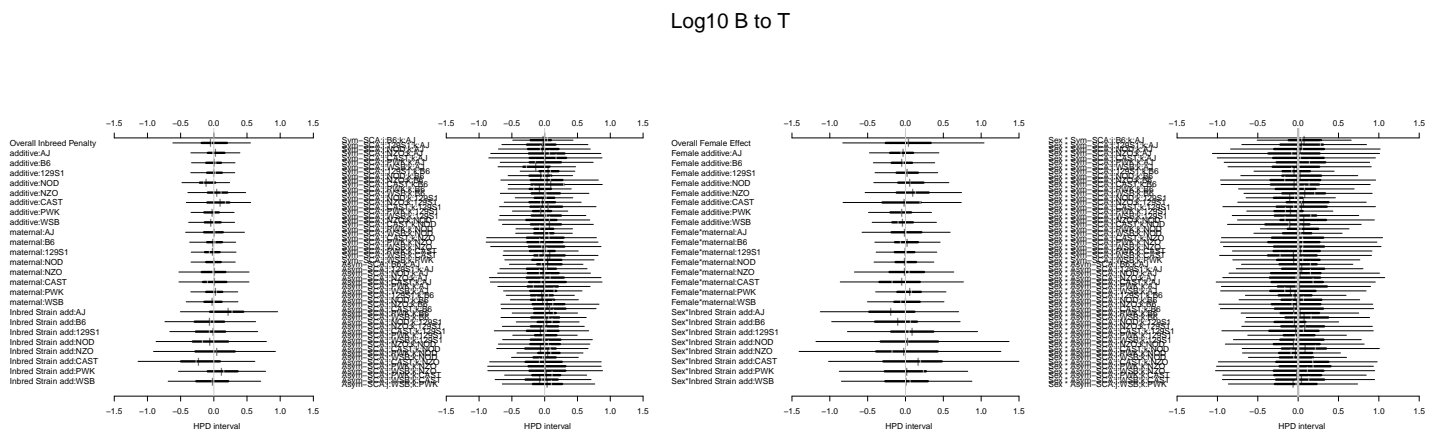

Figure 6.2: Diallel effects based on the normal model **without** accounting for batch effects on the phenotype under a log10 transformation.



Log10 B to T

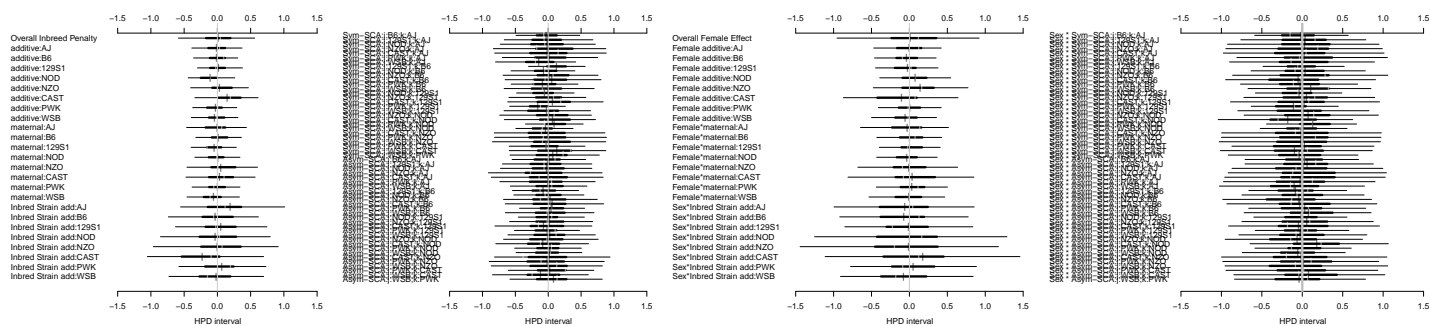

Figure 6.3: Diallel effects based on the normal model **accounting for batch** effects on the phenotype under a log10 transformation.

# Chapter 7

## CD11cplus.Pct: CD11c+/CD11b- dendritic cells

### 7.1 Data collected on CD11cplus.Pct

Description: CD11c+/CD11b- dendritic cells

Transformation: logit. Rationale for transformation: Natural range is a proportion between 0 and 1, so logit transformation provides an interpretable scale for effects.

Table 7.1: Number of mice phenotyped for CD11cplus.Pct

|         | AJ | B6 | 129S1 | NOD | NZO | CAST | PWK | WSB | F1  | PreCC | Total |
|---------|----|----|-------|-----|-----|------|-----|-----|-----|-------|-------|
| Female  | 4  | 4  | 4     | 0   | 0   | 0    | 3   | 2   | 51  | 0     | 68    |
| Male    | 2  | 6  | 2     | 6   | 10  | 2    | 6   | 8   | 81  | 54    | 177   |
| Unsexed | 0  | 61 | 0     | 0   | 0   | 0    | 0   | 0   | 0   | 0     | 61    |
| Total   | 6  | 71 | 6     | 6   | 10  | 2    | 9   | 10  | 132 | 54    | 306   |

### 7.2 Raw and Transformed Data

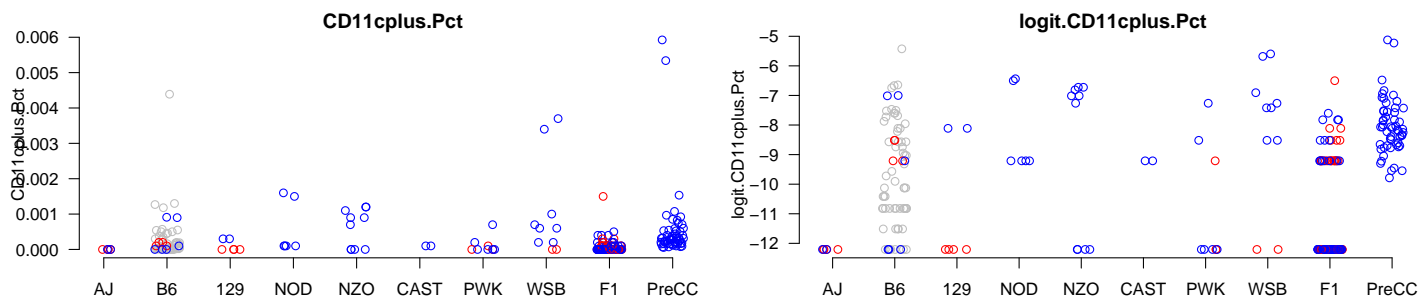

Figure 7.1: Phenotype values: raw and transformed for analysis for founder, F1 hybrid and PreCC mice. Colors distinguish females (red), males (blue), and unsexed (gray) mice.

Table 7.2: Point estimates. Upper table portion: mean and range statistics for raw phenotype values. Lower table portion: strain means and 95% CI on the transformed scale, as estimated from a linear model that includes a random intercept modeling the effects of 57 batches.

|                     | AJ    | B6       | 129S1    | NOD      | NZO     | CAST  | PWK      | WSB      | F1       | PreCC    |
|---------------------|-------|----------|----------|----------|---------|-------|----------|----------|----------|----------|
| Mean                | 0     | 0.000255 | 1e-04    | 0.000583 | 6e-04   | 1e-04 | 0.000111 | 0.00104  | 5.38e-05 | 0.000572 |
| SE of Mean          | 0     | 6.91e-05 | 6.32e-05 | 0.000306 | 0.00017 | 0     | 7.72e-05 | 0.000431 | 1.37e-05 | 0.000142 |
| Min                 | 0     | 0        | 0        | 1e-04    | 0       | 1e-04 | 0        | 0        | 0        | 5.62e-05 |
| Max                 | 0     | 0.00439  | 3e-04    | 0.0016   | 0.0012  | 1e-04 | 7e-04    | 0.0037   | 0.0015   | 0.00592  |
| Modeled 95%CI Lower | -11.2 | -10.2    | -11.1    | -10.4    | -11     | -12.2 | -11      | -9.9     | -11.1    | -10.4    |
| Modeled Mean        | -10.3 | -9.72    | -10.2    | -9.29    | -10.2   | -10.8 | -9.99    | -9.13    | -10.6    | -9.71    |
| Modeled 95%CI Upper | -9.37 | -9.25    | -9.34    | -8.13    | -9.43   | -9.35 | -8.99    | -8.36    | -10.1    | -9.05    |

Table 7.3: Sequential ANOVA table of strain and sex effects, controlling for batch, in the sexed subset of tested inbred strains.

|               | numerator df | denominator df | F-value | p-value |
|---------------|--------------|----------------|---------|---------|
| Sex           | 1            | 38             | 0.287   | 0.595   |
| Inbred Strain | 7            | 38             | 2.01    | 0.0785  |

### 7.3 Diallel analysis

Diallel analysis including batch effects and Bayesian imputation of missing sex assignments was performed as described in Methods. This diallel arose as a byproduct of another experiment, and suboptimal pairing of batches with F1 hybrid groups in the experimental design means that incorporating batch effects greatly increases uncertainty about estimated genetic parameters.

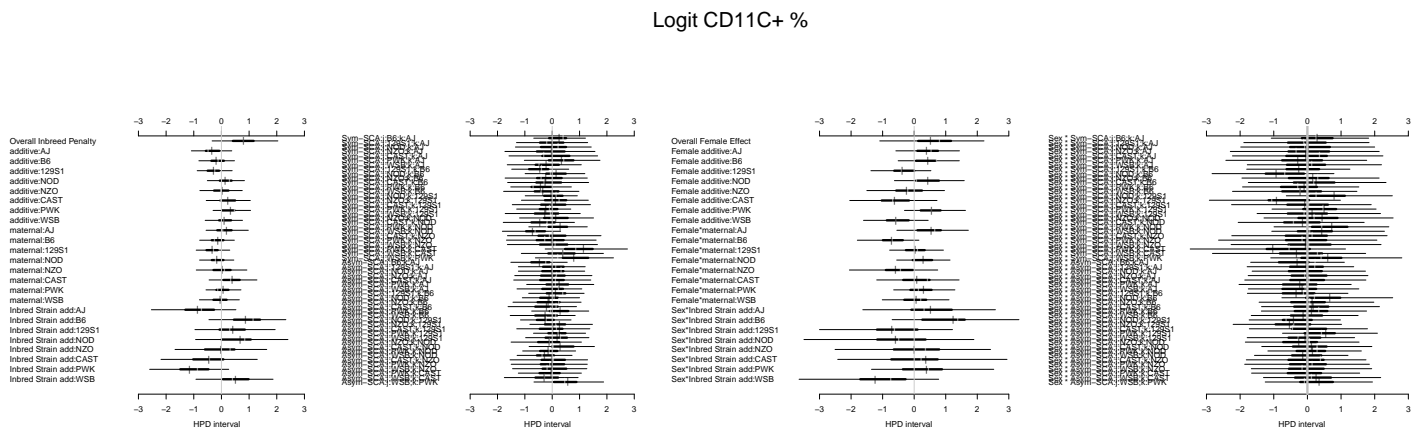

Figure 7.2: Diallel effects based on the normal model **without** accounting for batch effects on the phenotype under a logit transformation.

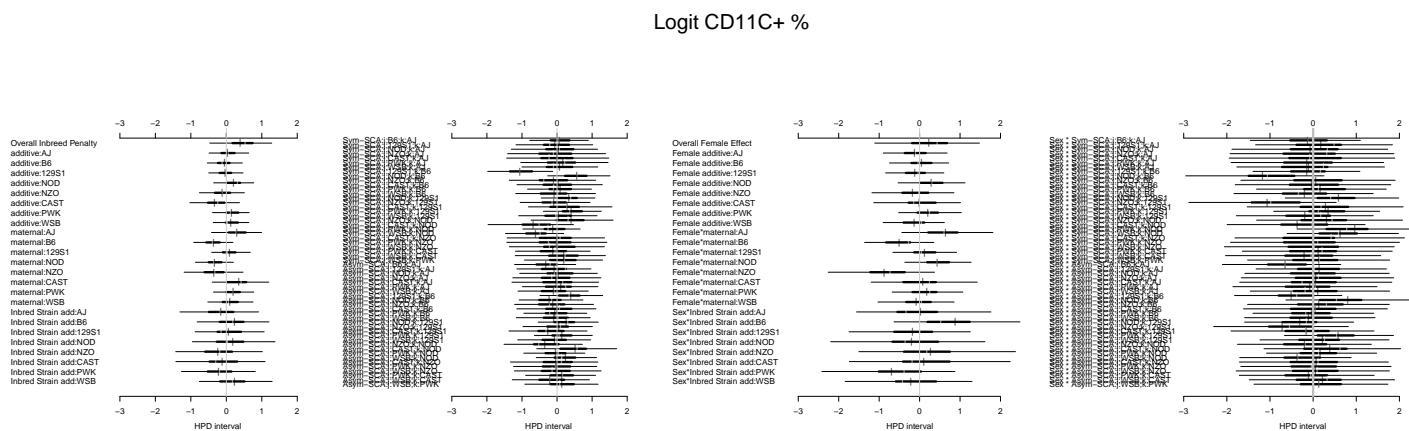

Figure 7.3: Diallel effects based on the normal model **accounting for batch** effects on the phenotype under a logit transformation.

# Chapter 8

## CD19.Pct: Total B-cells (CD19+)

### 8.1 Data collected on CD19.Pct

Description: Total B-cells (CD19+)

Transformation: logit. Rationale for transformation: Natural range is a proportion between 0 and 1, so logit transformation provides an interpretable scale for effects.

Table 8.1: Number of mice phenotyped for CD19.Pct

|         | AJ | B6 | 129S1 | NOD | NZO | CAST | PWK | WSB | F1  | PreCC | Total |
|---------|----|----|-------|-----|-----|------|-----|-----|-----|-------|-------|
| Female  | 4  | 4  | 4     | 0   | 0   | 0    | 3   | 2   | 51  | 0     | 68    |
| Male    | 2  | 6  | 2     | 6   | 10  | 2    | 6   | 8   | 81  | 66    | 189   |
| Unsexed | 0  | 62 | 0     | 0   | 0   | 0    | 0   | 0   | 0   | 0     | 62    |
| Total   | 6  | 72 | 6     | 6   | 10  | 2    | 9   | 10  | 132 | 66    | 319   |

### 8.2 Raw and Transformed Data

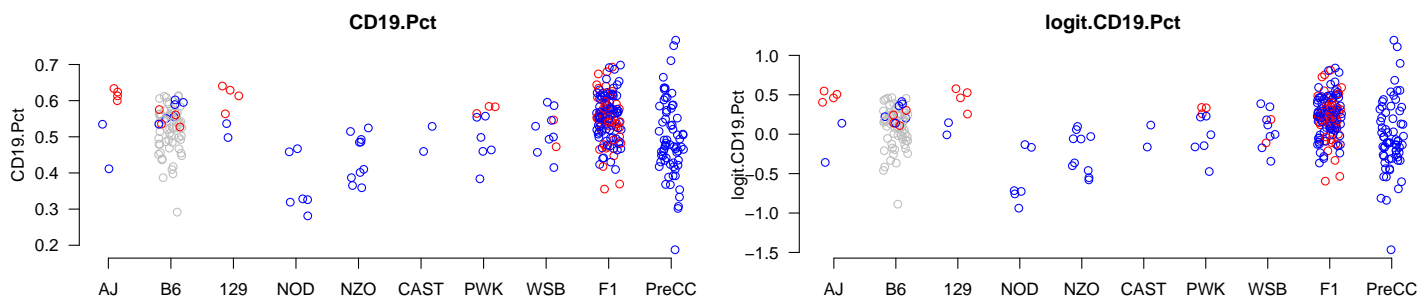

Figure 8.1: Phenotype values: raw and transformed for analysis for founder, F1 hybrid and PreCC mice. Colors distinguish females (red), males (blue), and unsexed (gray) mice.

Table 8.2: Point estimates. Upper table portion: mean and range statistics for raw phenotype values. Lower table portion: strain means and 95% CI on the transformed scale, as estimated from a linear model that includes a random intercept modeling the effects of 57 batches.

|                     | AJ     | B6      | 129S1  | NOD    | NZO     | CAST   | PWK    | WSB    | F1      | PreCC   |
|---------------------|--------|---------|--------|--------|---------|--------|--------|--------|---------|---------|
| Mean                | 0.569  | 0.526   | 0.58   | 0.363  | 0.442   | 0.494  | 0.516  | 0.514  | 0.553   | 0.493   |
| SE of Mean          | 0.0347 | 0.00723 | 0.0231 | 0.0322 | 0.0202  | 0.0347 | 0.0231 | 0.0181 | 0.00571 | 0.013   |
| Min                 | 0.412  | 0.292   | 0.498  | 0.281  | 0.359   | 0.46   | 0.384  | 0.415  | 0.355   | 0.188   |
| Max                 | 0.634  | 0.614   | 0.64   | 0.467  | 0.524   | 0.529  | 0.584  | 0.596  | 0.698   | 0.767   |
| Modeled 95%CI Lower | 0.041  | 0.016   | 0.132  | -0.891 | -0.502  | -0.243 | -0.144 | -0.101 | 0.142   | -0.0969 |
| Modeled Mean        | 0.297  | 0.0927  | 0.386  | -0.608 | -0.293  | 0.19   | 0.0868 | 0.0993 | 0.21    | 0.0185  |
| Modeled 95%CI Upper | 0.554  | 0.169   | 0.639  | -0.325 | -0.0832 | 0.623  | 0.318  | 0.299  | 0.277   | 0.134   |

Table 8.3: Sequential ANOVA table of strain and sex effects, controlling for batch, in the sexed subset of tested inbred strains.

|               | numerator df | denominator df | F-value | p-value |
|---------------|--------------|----------------|---------|---------|
| Sex           | 1            | 38             | 6.68    | 0.0137  |
| Inbred Strain | 7            | 38             | 4.14    | 0.00179 |

### 8.3 Diallel analysis

Diallel analysis including batch effects and Bayesian imputation of missing sex assignments was performed as described in Methods. This diallel arose as a byproduct of another experiment, and suboptimal pairing of batches with F1 hybrid groups in the experimental design means that incorporating batch effects greatly increases uncertainty about estimated genetic parameters.

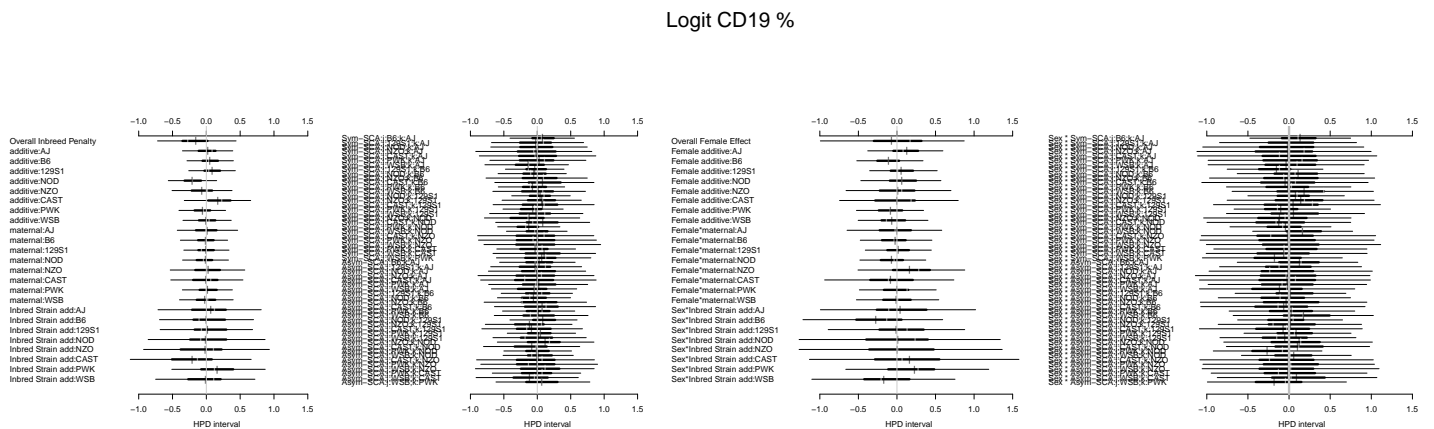

Figure 8.2: Diallel effects based on the normal model **without** accounting for batch effects on the phenotype under a logit transformation.

Logit CD19 %

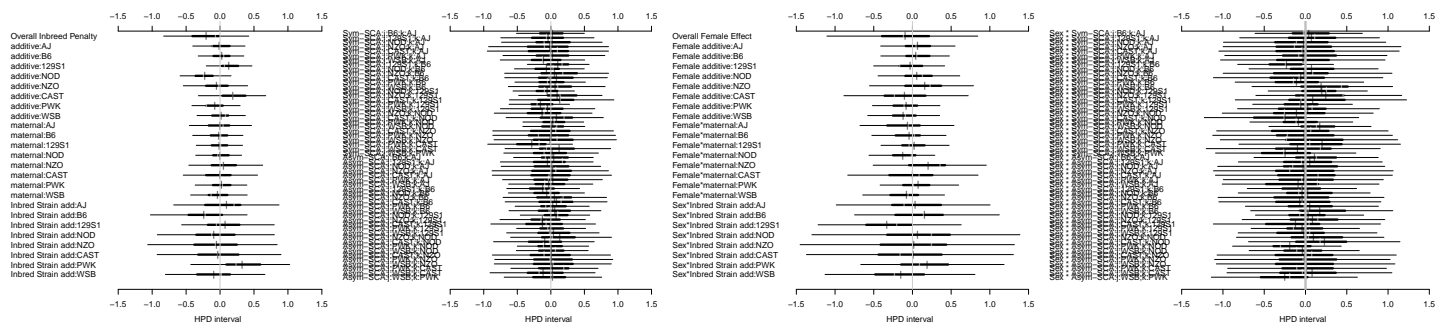

Figure 8.3: Diallel effects based on the normal model **accounting for batch effects** on the phenotype under a logit transformation.

## Chapter 9

# CD23.MFI: CD23 antigen density on all B-cells

### 9.1 Data collected on CD23.MFI

Description: CD23 antigen density on all B-cells

Transformation: log10. Rationale for transformation: Dimensionless quantity, but Box-Cox suggests a logarithmic transformation. Log to base 10 (log10) is used to provide a more interpretable scale.

Table 9.1: Number of mice phenotyped for CD23.MFI

|         | AJ | B6 | 129S1 | NOD | NZO | CAST | PWK | WSB | F1  | PreCC | Total |
|---------|----|----|-------|-----|-----|------|-----|-----|-----|-------|-------|
| Female  | 4  | 4  | 4     | 0   | 0   | 0    | 3   | 2   | 51  | 0     | 68    |
| Male    | 2  | 6  | 2     | 6   | 10  | 2    | 6   | 8   | 81  | 66    | 189   |
| Unsexed | 0  | 62 | 0     | 0   | 0   | 0    | 0   | 0   | 0   | 0     | 62    |
| Total   | 6  | 72 | 6     | 6   | 10  | 2    | 9   | 10  | 132 | 66    | 319   |

### 9.2 Raw and Transformed Data

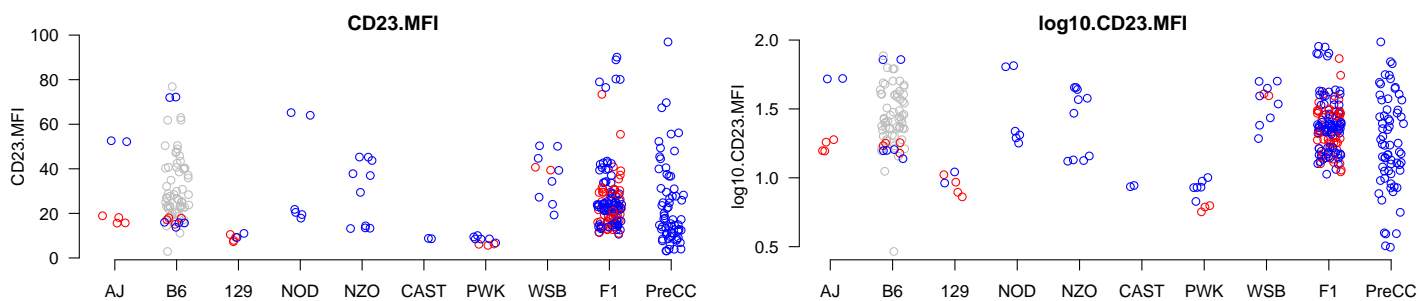

Figure 9.1: Phenotype values: raw and transformed for analysis for founder, F1 hybrid and PreCC mice. Colors distinguish females (red), males (blue), and unsexed (gray) mice.



Table 9.2: Point estimates. Upper table portion: mean and range statistics for raw phenotype values. Lower table portion: strain means and 95% CI on the transformed scale, as estimated from a linear model that includes a random intercept modeling the effects of 57 batches.

|                     | AJ   | B6   | 129S1 | NOD  | NZO  | CAST   | PWK   | WSB  | F1   | PreCC |
|---------------------|------|------|-------|------|------|--------|-------|------|------|-------|
| Mean                | 28.9 | 30.5 | 9.19  | 34.8 | 29.3 | 8.71   | 7.76  | 37   | 26.8 | 23.6  |
| SE of Mean          | 7.46 | 1.84 | 0.597 | 9.44 | 4.51 | 0.0845 | 0.528 | 3.36 | 1.35 | 2.28  |
| Min                 | 15.6 | 2.92 | 7.27  | 17.9 | 13.2 | 8.62   | 5.66  | 19.3 | 10.6 | 3.13  |
| Max                 | 52.6 | 76.9 | 11    | 65.2 | 45.3 | 8.79   | 10    | 50.3 | 90.1 | 96.9  |
| Modeled 95%CI Lower | 1.2  | 1.38 | 0.878 | 1.23 | 1.24 | 0.767  | 0.742 | 1.28 | 1.29 | 1.21  |
| Modeled Mean        | 1.37 | 1.44 | 1.04  | 1.44 | 1.39 | 1.05   | 0.917 | 1.42 | 1.35 | 1.31  |
| Modeled 95%CI Upper | 1.54 | 1.51 | 1.21  | 1.65 | 1.53 | 1.33   | 1.09  | 1.56 | 1.41 | 1.41  |

Table 9.3: Sequential ANOVA table of strain and sex effects, controlling for batch, in the sexed subset of tested inbred strains.

|               | numerator df | denominator df | F-value | p-value |
|---------------|--------------|----------------|---------|---------|
| Sex           | 1            | 38             | 7.19    | 0.0108  |
| Inbred Strain | 7            | 38             | 14.3    | 6.1e-09 |

### 9.3 Diallel analysis

Diallel analysis including batch effects and Bayesian imputation of missing sex assignments was performed as described in Methods. This diallel arose as a byproduct of another experiment, and suboptimal pairing of batches with F1 hybrid groups in the experimental design means that incorporating batch effects greatly increases uncertainty about estimated genetic parameters.

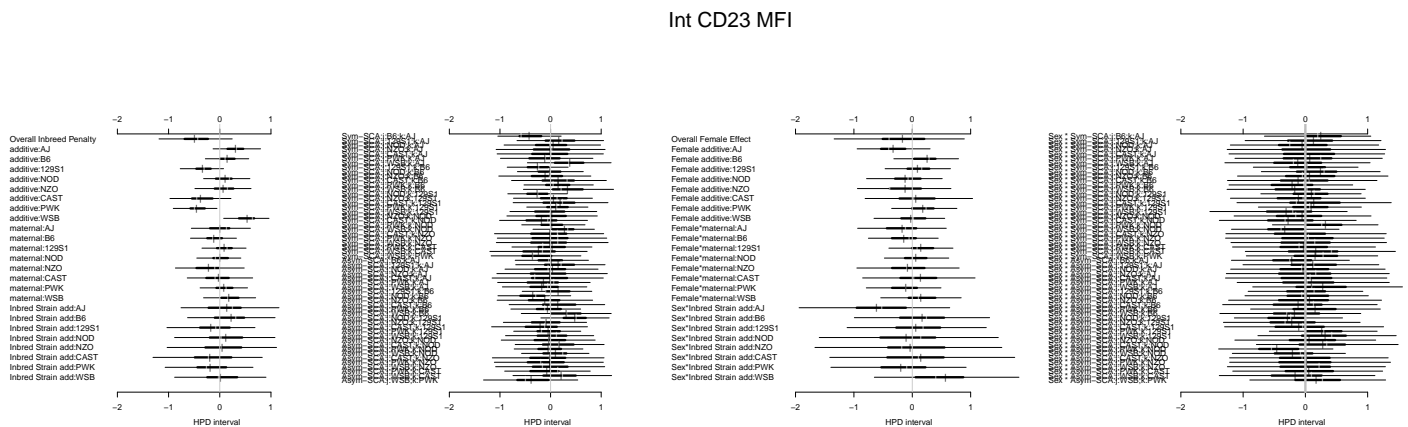

Figure 9.2: Diallel effects based on the normal model **without** accounting for batch effects on the phenotype under a log10 transformation.

Int Log<sub>10</sub> of CD23 MFI

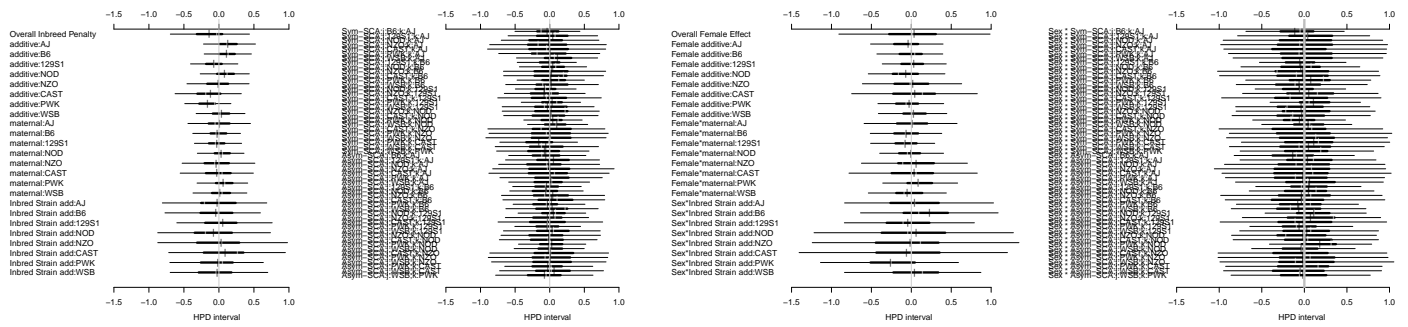

Figure 9.3: Diallel effects based on the normal model **accounting for batch** effects on the phenotype under a log<sub>10</sub> transformation.

# Chapter 10

## CD25.Pct.CD4: Regulatory T-cells

### 10.1 Data collected on CD25.Pct.CD4

Description: Regulatory T-cells

Transformation: logit. Rationale for transformation: Natural range is a proportion between 0 and 1, so logit transformation provides an interpretable scale for effects.

Table 10.1: Number of mice phenotyped for CD25.Pct.CD4

|         | AJ | B6 | 129S1 | NOD | NZO | CAST | PWK | WSB | F1  | PreCC | Total |
|---------|----|----|-------|-----|-----|------|-----|-----|-----|-------|-------|
| Female  | 4  | 4  | 4     | 0   | 0   | 0    | 3   | 2   | 51  | 0     | 68    |
| Male    | 2  | 6  | 2     | 6   | 10  | 2    | 6   | 8   | 81  | 66    | 189   |
| Unsexed | 0  | 58 | 0     | 0   | 0   | 0    | 0   | 0   | 0   | 0     | 58    |
| Total   | 6  | 68 | 6     | 6   | 10  | 2    | 9   | 10  | 132 | 66    | 315   |

### 10.2 Raw and Transformed Data

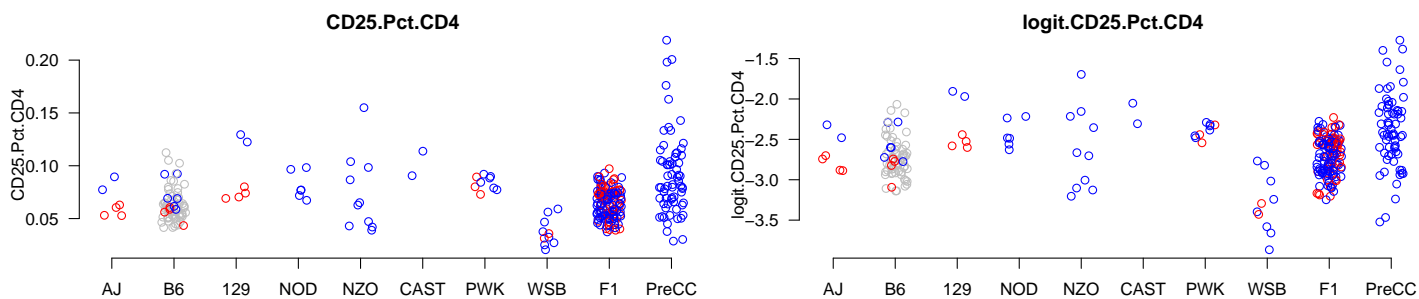

Figure 10.1: Phenotype values: raw and transformed for analysis for founder, F1 hybrid and PreCC mice. Colors distinguish females (red), males (blue), and unsexed (gray) mice.

Table 10.2: Point estimates. Upper table portion: mean and range statistics for raw phenotype values. Lower table portion: strain means and 95% CI on the transformed scale, as estimated from a linear model that includes a random intercept modeling the effects of 55 batches.

|                     | AJ      | B6      | 129S1  | NOD     | NZO    | CAST   | PWK     | WSB     | F1      | PreCC   |
|---------------------|---------|---------|--------|---------|--------|--------|---------|---------|---------|---------|
| Mean                | 0.066   | 0.0633  | 0.091  | 0.0813  | 0.0743 | 0.102  | 0.0837  | 0.0372  | 0.0645  | 0.0914  |
| SE of Mean          | 0.00595 | 0.00188 | 0.0112 | 0.00531 | 0.0117 | 0.0116 | 0.00222 | 0.00411 | 0.00119 | 0.00481 |
| Min                 | 0.0528  | 0.0415  | 0.0691 | 0.0673  | 0.039  | 0.0906 | 0.0729  | 0.0205  | 0.0374  | 0.0287  |
| Max                 | 0.0895  | 0.112   | 0.13   | 0.0983  | 0.155  | 0.114  | 0.092   | 0.0591  | 0.0972  | 0.219   |
| Modeled 95%CI Lower | -2.84   | -2.8    | -2.53  | -2.74   | -2.8   | -2.69  | -2.64   | -3.53   | -2.73   | -2.51   |
| Modeled Mean        | -2.59   | -2.72   | -2.27  | -2.47   | -2.6   | -2.26  | -2.42   | -3.33   | -2.67   | -2.41   |
| Modeled 95%CI Upper | -2.34   | -2.64   | -2.02  | -2.2    | -2.39  | -1.83  | -2.19   | -3.13   | -2.61   | -2.3    |

Table 10.3: Sequential ANOVA table of strain and sex effects, controlling for batch, in the sexed subset of tested inbred strains.

|               | numerator df | denominator df | F-value | p-value  |
|---------------|--------------|----------------|---------|----------|
| Sex           | 1            | 38             | 22.7    | 2.73e-05 |
| Inbred Strain | 7            | 38             | 7.75    | 8.15e-06 |

### 10.3 Diallel analysis

Diallel analysis including batch effects and Bayesian imputation of missing sex assignments was performed as described in Methods. This diallel arose as a byproduct of another experiment, and suboptimal pairing of batches with F1 hybrid groups in the experimental design means that incorporating batch effects greatly increases uncertainty about estimated genetic parameters.

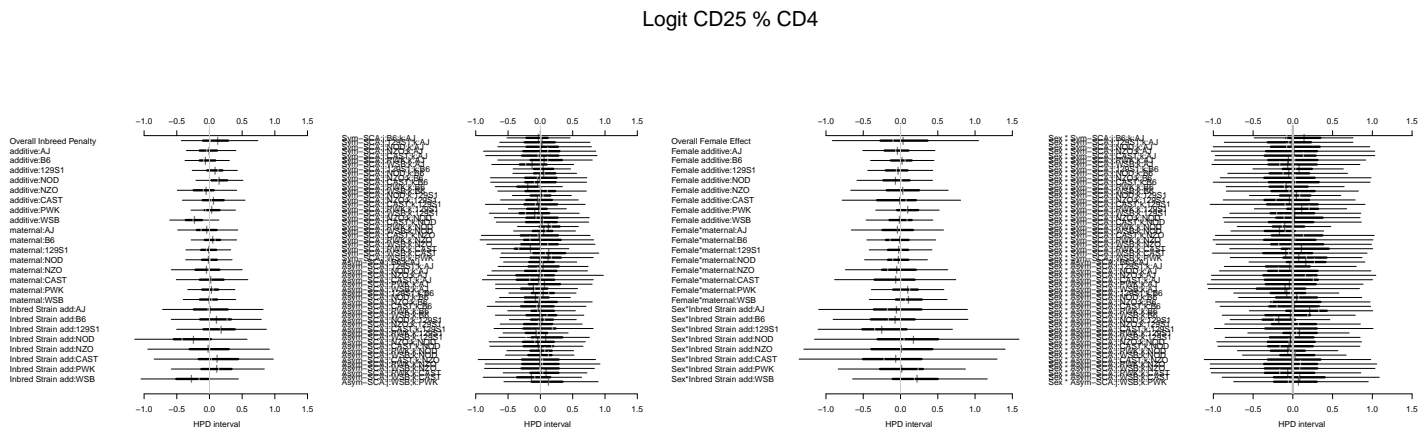

Figure 10.2: Diallel effects based on the normal model **without** accounting for batch effects on the phenotype under a logit transformation.

Logit CD25 % CD4

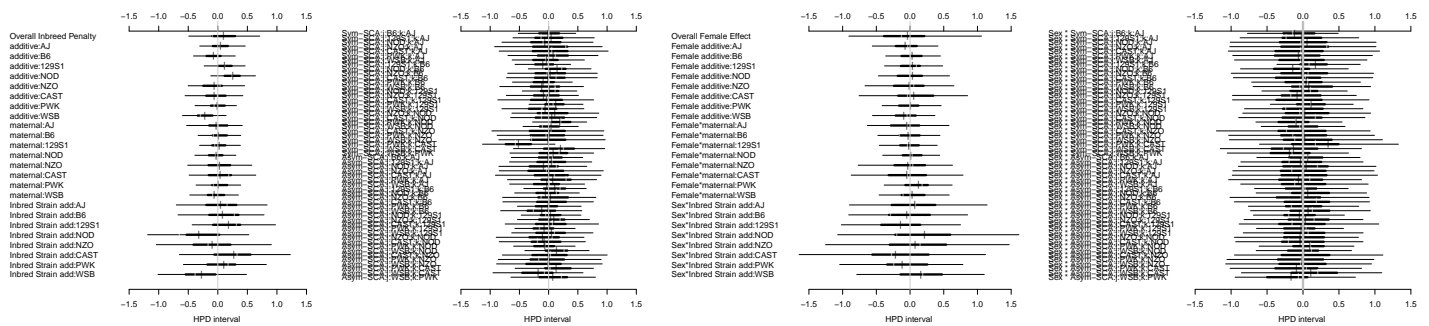

Figure 10.3: Diallel effects based on the normal model **accounting for batch** effects on the phenotype under a logit transformation.

# Chapter 11

## CD4.Pct.H57: Helper and regulatory T-cells

### 11.1 Data collected on CD4.Pct.H57

Description: Helper and regulatory T-cells

Transformation: logit. Rationale for transformation: Natural range is a proportion between 0 and 1, so logit transformation provides an interpretable scale for effects.

Table 11.1: Number of mice phenotyped for CD4.Pct.H57

|         | AJ | B6 | 129S1 | NOD | NZO | CAST | PWK | WSB | F1  | PreCC | Total |
|---------|----|----|-------|-----|-----|------|-----|-----|-----|-------|-------|
| Female  | 4  | 4  | 4     | 0   | 0   | 0    | 3   | 2   | 51  | 0     | 68    |
| Male    | 2  | 6  | 2     | 6   | 10  | 2    | 6   | 8   | 81  | 66    | 189   |
| Unsexed | 0  | 62 | 0     | 0   | 0   | 0    | 0   | 0   | 0   | 0     | 62    |
| Total   | 6  | 72 | 6     | 6   | 10  | 2    | 9   | 10  | 132 | 66    | 319   |

### 11.2 Raw and Transformed Data

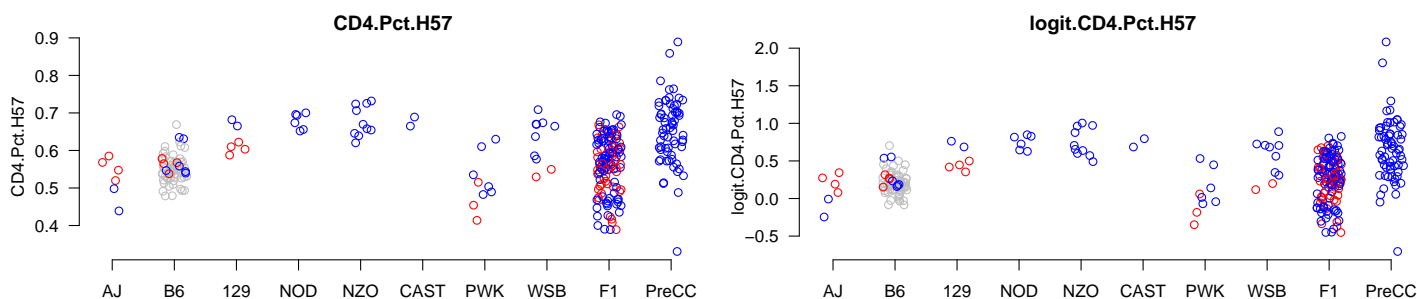

Figure 11.1: Phenotype values: raw and transformed for analysis for founder, F1 hybrid and PreCC mice. Colors distinguish females (red), males (blue), and unsexed (gray) mice.

Table 11.2: Point estimates. Upper table portion: mean and range statistics for raw phenotype values. Lower table portion: strain means and 95% CI on the transformed scale, as estimated from a linear model that includes a random intercept modeling the effects of 57 batches.

|                     | AJ     | B6      | 129S1  | NOD     | NZO    | CAST   | PWK    | WSB    | F1     | PreCC  |
|---------------------|--------|---------|--------|---------|--------|--------|--------|--------|--------|--------|
| Mean                | 0.526  | 0.551   | 0.628  | 0.679   | 0.677  | 0.677  | 0.515  | 0.627  | 0.561  | 0.651  |
| SE of Mean          | 0.0217 | 0.00424 | 0.0152 | 0.00866 | 0.0129 | 0.0121 | 0.0231 | 0.0194 | 0.0065 | 0.0108 |
| Min                 | 0.439  | 0.479   | 0.588  | 0.652   | 0.62   | 0.665  | 0.414  | 0.53   | 0.389  | 0.331  |
| Max                 | 0.585  | 0.669   | 0.682  | 0.7     | 0.732  | 0.689  | 0.63   | 0.709  | 0.696  | 0.889  |
| Modeled 95%CI Lower | -0.202 | 0.129   | 0.123  | 0.428   | 0.612  | 0.161  | -0.148 | 0.27   | 0.182  | 0.435  |
| Modeled Mean        | 0.0339 | 0.202   | 0.354  | 0.697   | 0.806  | 0.557  | 0.0717 | 0.455  | 0.249  | 0.549  |
| Modeled 95%CI Upper | 0.27   | 0.274   | 0.586  | 0.965   | 1      | 0.953  | 0.292  | 0.64   | 0.316  | 0.663  |

Table 11.3: Sequential ANOVA table of strain and sex effects, controlling for batch, in the sexed subset of tested inbred strains.

|               | numerator df | denominator df | F-value | p-value  |
|---------------|--------------|----------------|---------|----------|
| Sex           | 1            | 38             | 0.298   | 0.588    |
| Inbred Strain | 7            | 38             | 8.87    | 1.97e-06 |

### 11.3 Diallel analysis

Diallel analysis including batch effects and Bayesian imputation of missing sex assignments was performed as described in Methods. This diallel arose as a byproduct of another experiment, and suboptimal pairing of batches with F1 hybrid groups in the experimental design means that incorporating batch effects greatly increases uncertainty about estimated genetic parameters.

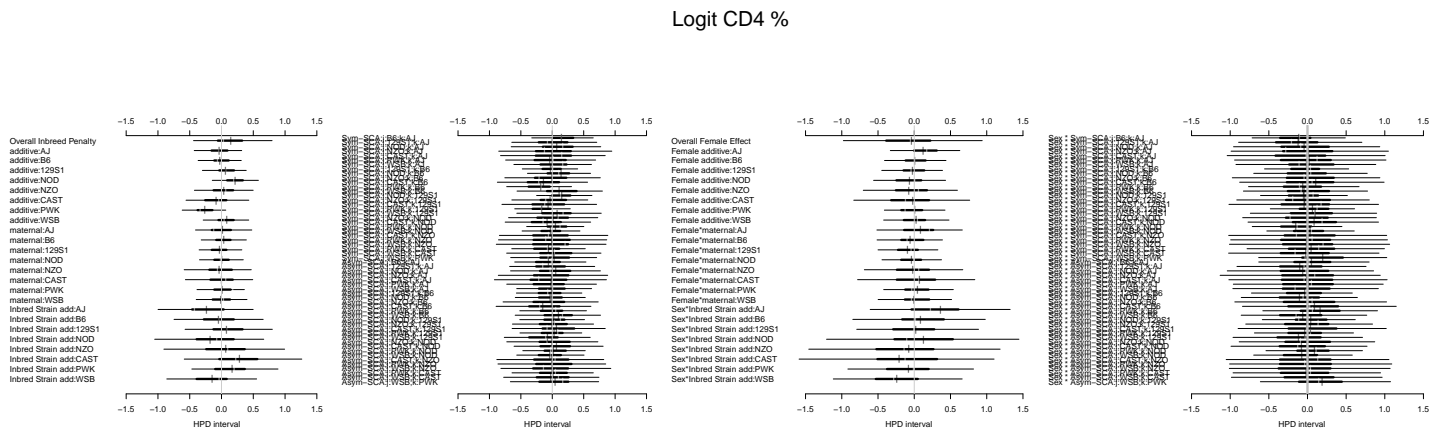

Figure 11.2: Diallel effects based on the normal model **without** accounting for batch effects on the phenotype under a logit transformation.

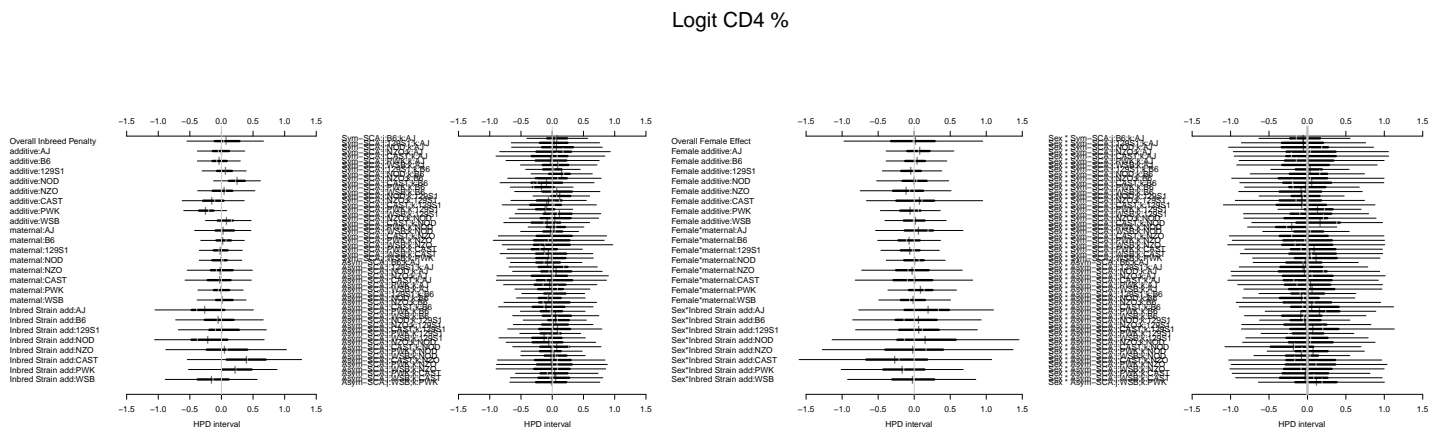

Figure 11.3: Diallel effects based on the normal model **accounting for batch** effects on the phenotype under a logit transformation.



## Chapter 12

# CD4.to.CD8: Ratio of helper T-cells to cytotoxic T-cells

### 12.1 Data collected on CD4.to.CD8

Description: Ratio of helper T-cells to cytotoxic T-cells

Transformation: log10. Rationale for transformation: Ratio quantity and therefore highly skewed. Logarithmic transformation brings it onto an additive, symmetric scale. Log to base 10 (log10) is used to provide a more interpretable scale for the effects.

Table 12.1: Number of mice phenotyped for CD4.to.CD8

|         | AJ | B6 | 129S1 | NOD | NZO | CAST | PWK | WSB | F1  | PreCC | Total |
|---------|----|----|-------|-----|-----|------|-----|-----|-----|-------|-------|
| Female  | 4  | 4  | 4     | 0   | 0   | 0    | 3   | 2   | 51  | 0     | 68    |
| Male    | 2  | 6  | 2     | 6   | 10  | 2    | 6   | 8   | 81  | 66    | 189   |
| Unsexed | 0  | 62 | 0     | 0   | 0   | 0    | 0   | 0   | 0   | 0     | 62    |
| Total   | 6  | 72 | 6     | 6   | 10  | 2    | 9   | 10  | 132 | 66    | 319   |

### 12.2 Raw and Transformed Data

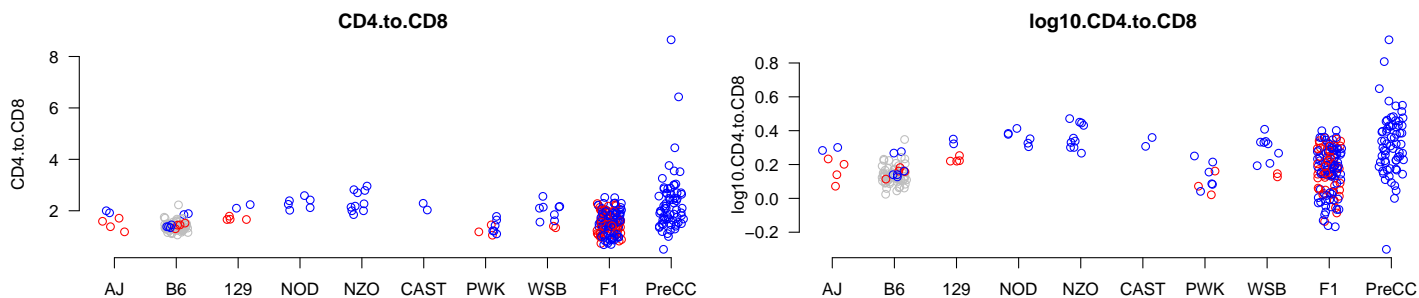

Figure 12.1: Phenotype values: raw and transformed for analysis for founder, F1 hybrid and PreCC mice. Colors distinguish females (red), males (blue), and unsexed (gray) mice.

Table 12.2: Point estimates. Upper table portion: mean and range statistics for raw phenotype values. Lower table portion: strain means and 95% CI on the transformed scale, as estimated from a linear model that includes a random intercept modeling the effects of 57 batches.

|                     | AJ    | B6     | 129S1 | NOD    | NZO   | CAST  | PWK    | WSB   | F1    | PreCC |
|---------------------|-------|--------|-------|--------|-------|-------|--------|-------|-------|-------|
| Mean                | 1.63  | 1.4    | 1.85  | 2.3    | 2.37  | 2.16  | 1.34   | 1.89  | 1.53  | 2.31  |
| SE of Mean          | 0.128 | 0.0225 | 0.104 | 0.0856 | 0.128 | 0.13  | 0.0835 | 0.126 | 0.038 | 0.147 |
| Min                 | 1.18  | 1.06   | 1.66  | 2.02   | 1.85  | 2.03  | 1.05   | 1.34  | 0.68  | 0.5   |
| Max                 | 2     | 2.23   | 2.24  | 2.59   | 2.96  | 2.29  | 1.78   | 2.56  | 2.52  | 8.65  |
| Modeled 95%CI Lower | 0.069 | 0.111  | 0.117 | 0.231  | 0.312 | 0.114 | 0.0304 | 0.151 | 0.138 | 0.244 |
| Modeled Mean        | 0.173 | 0.142  | 0.22  | 0.346  | 0.397 | 0.29  | 0.124  | 0.233 | 0.165 | 0.29  |
| Modeled 95%CI Upper | 0.277 | 0.173  | 0.323 | 0.46   | 0.482 | 0.466 | 0.217  | 0.314 | 0.192 | 0.337 |

Table 12.3: Sequential ANOVA table of strain and sex effects, controlling for batch, in the sexed subset of tested inbred strains.

|               | numerator df | denominator df | F-value | p-value  |
|---------------|--------------|----------------|---------|----------|
| Sex           | 1            | 38             | 23.2    | 2.34e-05 |
| Inbred Strain | 7            | 38             | 6.45    | 4.91e-05 |

## 12.3 Diallel analysis

Diallel analysis including batch effects and Bayesian imputation of missing sex assignments was performed as described in Methods. This diallel arose as a byproduct of another experiment, and suboptimal pairing of batches with F1 hybrid groups in the experimental design means that incorporating batch effects greatly increases uncertainty about estimated genetic parameters.

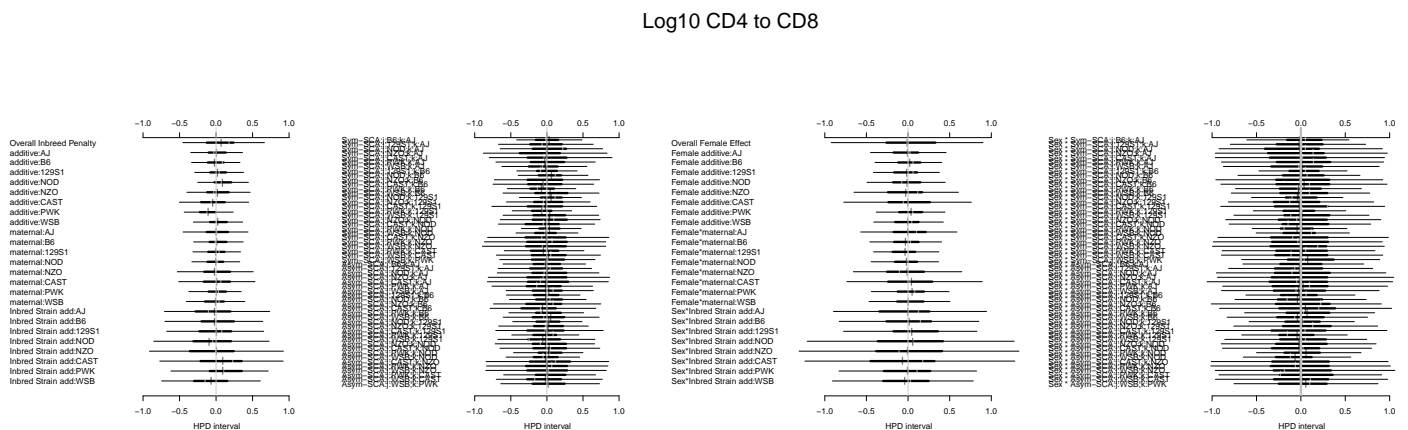

Figure 12.2: Diallel effects based on the normal model **without** accounting for batch effects on the phenotype under a log10 transformation.

Log10 CD4 to CD8

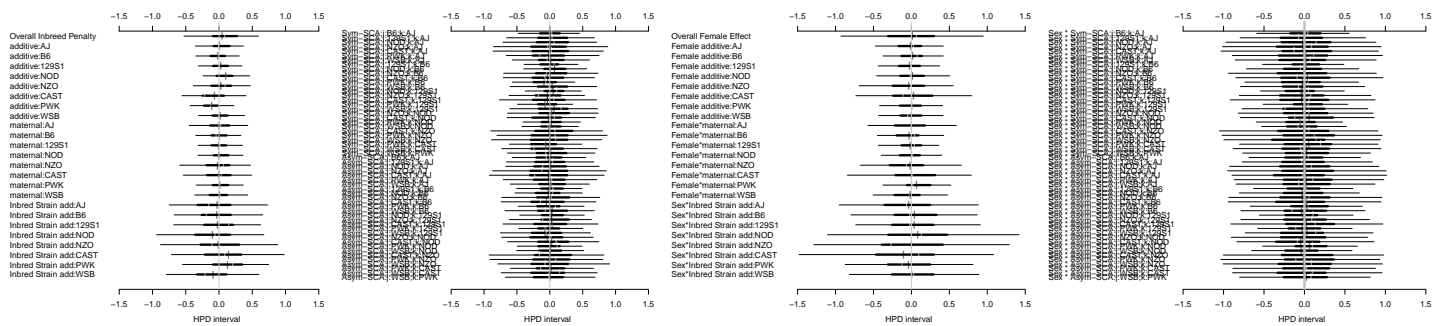

Figure 12.3: Diallel effects based on the normal model **accounting for batch effects** on the phenotype under a log10 transformation.

# Chapter 13

## CD8.Pct.H57: Cytotoxic T-cells

### 13.1 Data collected on CD8.Pct.H57

Description: Cytotoxic T-cells

Transformation: logit. Rationale for transformation: Natural range is a proportion between 0 and 1, so logit transformation provides an interpretable scale for effects.

Table 13.1: Number of mice phenotyped for CD8.Pct.H57

|         | AJ | B6 | 129S1 | NOD | NZO | CAST | PWK | WSB | F1  | PreCC | Total |
|---------|----|----|-------|-----|-----|------|-----|-----|-----|-------|-------|
| Female  | 4  | 4  | 4     | 0   | 0   | 0    | 3   | 2   | 51  | 0     | 68    |
| Male    | 2  | 6  | 2     | 6   | 10  | 2    | 6   | 8   | 81  | 66    | 189   |
| Unsexed | 0  | 62 | 0     | 0   | 0   | 0    | 0   | 0   | 0   | 0     | 62    |
| Total   | 6  | 72 | 6     | 6   | 10  | 2    | 9   | 10  | 132 | 66    | 319   |

### 13.2 Raw and Transformed Data

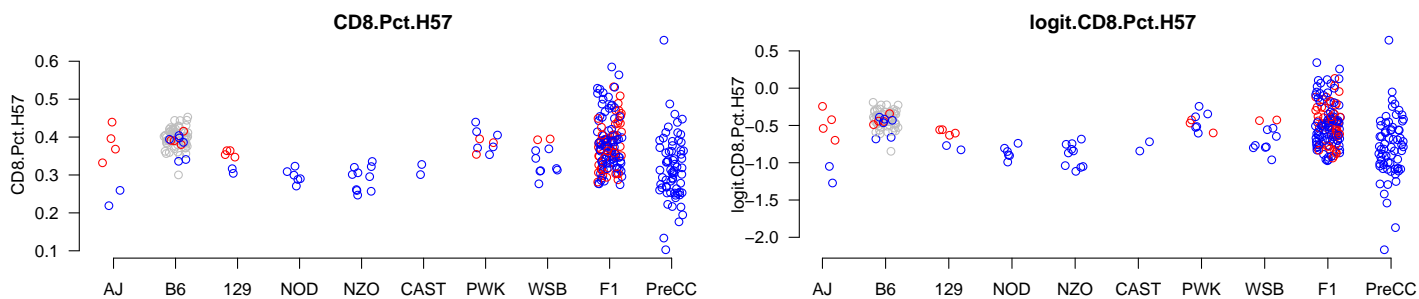

Figure 13.1: Phenotype values: raw and transformed for analysis for founder, F1 hybrid and PreCC mice. Colors distinguish females (red), males (blue), and unsexed (gray) mice.

Table 13.2: Point estimates. Upper table portion: mean and range statistics for raw phenotype values. Lower table portion: strain means and 95% CI on the transformed scale, as estimated from a linear model that includes a random intercept modeling the effects of 57 batches.

|                     | AJ     | B6      | 129S1  | NOD    | NZO    | CAST   | PWK    | WSB    | F1      | PreCC  |
|---------------------|--------|---------|--------|--------|--------|--------|--------|--------|---------|--------|
| Mean                | 0.336  | 0.396   | 0.342  | 0.297  | 0.29   | 0.314  | 0.388  | 0.339  | 0.385   | 0.318  |
| SE of Mean          | 0.0341 | 0.00315 | 0.0103 | 0.0074 | 0.0101 | 0.0134 | 0.0095 | 0.0126 | 0.00594 | 0.0107 |
| Min                 | 0.219  | 0.3     | 0.304  | 0.271  | 0.247  | 0.301  | 0.354  | 0.277  | 0.274   | 0.103  |
| Max                 | 0.439  | 0.453   | 0.364  | 0.323  | 0.336  | 0.328  | 0.44   | 0.395  | 0.585   | 0.655  |
| Modeled 95%CI Lower | -0.876 | -0.49   | -0.833 | -1.09  | -1.15  | -1.13  | -0.667 | -0.775 | -0.534  | -0.832 |
| Modeled Mean        | -0.642 | -0.421  | -0.602 | -0.843 | -0.96  | -0.729 | -0.462 | -0.593 | -0.475  | -0.732 |
| Modeled 95%CI Upper | -0.409 | -0.353  | -0.37  | -0.591 | -0.771 | -0.334 | -0.257 | -0.411 | -0.416  | -0.633 |

Table 13.3: Sequential ANOVA table of strain and sex effects, controlling for batch, in the sexed subset of tested inbred strains.

|               | numerator df | denominator df | F-value | p-value  |
|---------------|--------------|----------------|---------|----------|
| Sex           | 1            | 38             | 45.4    | 5.56e-08 |
| Inbred Strain | 7            | 38             | 5.38    | 0.000242 |

### 13.3 Diallel analysis

Diallel analysis including batch effects and Bayesian imputation of missing sex assignments was performed as described in Methods. This diallel arose as a byproduct of another experiment, and suboptimal pairing of batches with F1 hybrid groups in the experimental design means that incorporating batch effects greatly increases uncertainty about estimated genetic parameters.

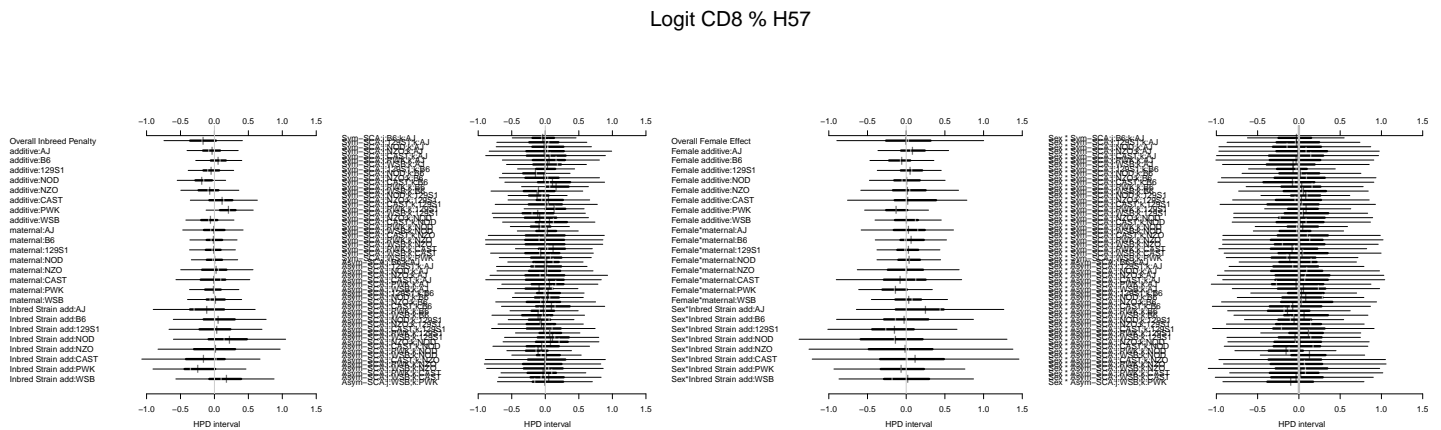

Figure 13.2: Diallel effects based on the normal model **without** accounting for batch effects on the phenotype under a logit transformation.

Logit CD8 % H57

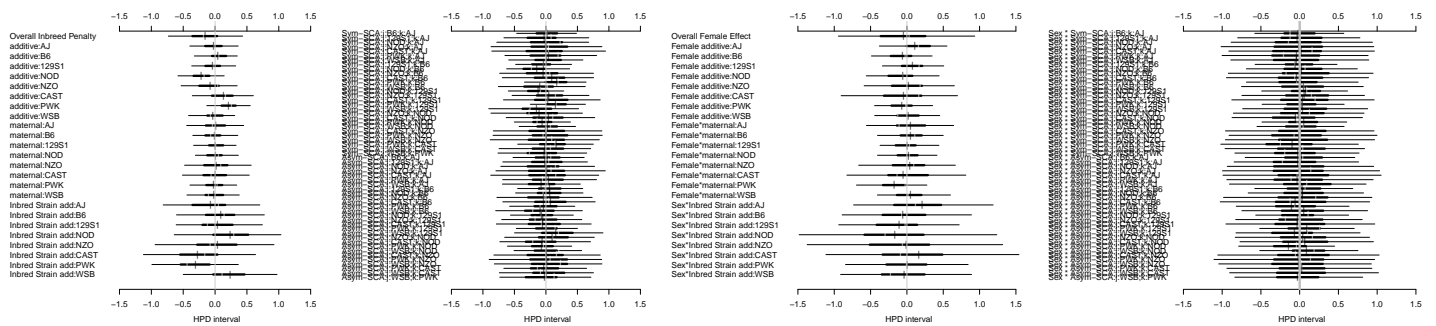

Figure 13.3: Diallel effects based on the normal model **accounting for batch** effects on the phenotype under a logit transformation.

# Chapter 14

## DCs.CD11b.MFI: CD11b antigen density on dendritic cells

### 14.1 Data collected on DCs.CD11b.MFI

Description: CD11b antigen density on dendritic cells

Transformation: log10. Rationale for transformation: Dimensionless quantity, but Box-Cox suggests a logarithmic transformation. Log to base 10 (log10) is used to provide a more interpretable scale.

Table 14.1: Number of mice phenotyped for DCs.CD11b.MFI

|         | AJ | B6 | 129S1 | NOD | NZO | CAST | PWK | WSB | F1  | PreCC | Total |
|---------|----|----|-------|-----|-----|------|-----|-----|-----|-------|-------|
| Female  | 4  | 4  | 4     | 0   | 0   | 0    | 3   | 2   | 51  | 0     | 68    |
| Male    | 2  | 6  | 2     | 6   | 10  | 2    | 6   | 8   | 81  | 54    | 177   |
| Unsexed | 0  | 61 | 0     | 0   | 0   | 0    | 0   | 0   | 0   | 0     | 61    |
| Total   | 6  | 71 | 6     | 6   | 10  | 2    | 9   | 10  | 132 | 54    | 306   |

### 14.2 Raw and Transformed Data

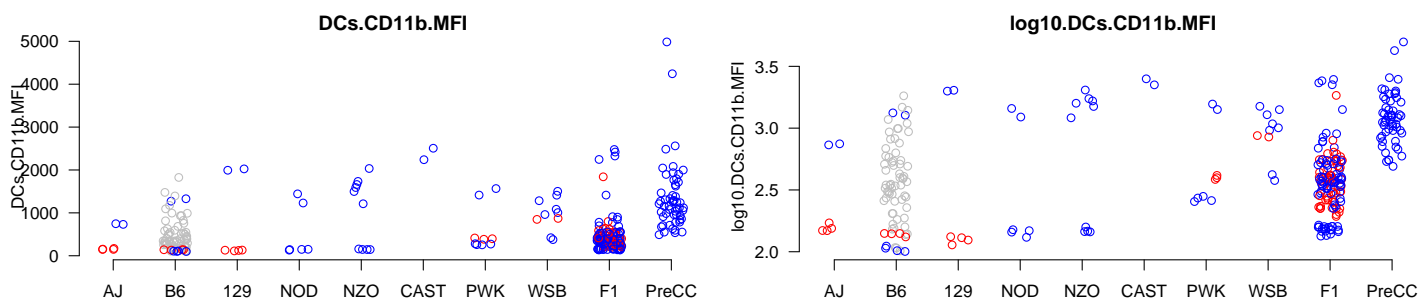

Figure 14.1: Phenotype values: raw and transformed for analysis for founder, F1 hybrid and PreCC mice. Colors distinguish females (red), males (blue), and unsexed (gray) mice.

Table 14.2: Point estimates. Upper table portion: mean and range statistics for raw phenotype values. Lower table portion: strain means and 95% CI on the transformed scale, as estimated from a linear model that includes a random intercept modeling the effects of 57 batches.

|                     | AJ   | B6   | 129S1 | NOD  | NZO  | CAST | PWK  | WSB  | F1   | PreCC |
|---------------------|------|------|-------|------|------|------|------|------|------|-------|
| Mean                | 350  | 467  | 753   | 541  | 1030 | 2370 | 583  | 977  | 451  | 1360  |
| SE of Mean          | 123  | 45.4 | 397   | 253  | 249  | 134  | 173  | 119  | 35.7 | 111   |
| Min                 | 148  | 101  | 114   | 131  | 145  | 2240 | 255  | 377  | 134  | 491   |
| Max                 | 747  | 1830 | 2030  | 1440 | 2030 | 2510 | 1570 | 1500 | 2480 | 4990  |
| Modeled 95%CI Lower | 2.52 | 2.5  | 2.54  | 2.27 | 2.45 | 2.74 | 2.48 | 2.57 | 2.57 | 2.7   |
| Modeled Mean        | 2.67 | 2.58 | 2.69  | 2.45 | 2.57 | 2.97 | 2.64 | 2.69 | 2.65 | 2.81  |
| Modeled 95%CI Upper | 2.81 | 2.66 | 2.83  | 2.64 | 2.7  | 3.19 | 2.8  | 2.81 | 2.73 | 2.92  |

Table 14.3: Sequential ANOVA table of strain and sex effects, controlling for batch, in the sexed subset of tested inbred strains.

|               | numerator df | denominator df | F-value | p-value |
|---------------|--------------|----------------|---------|---------|
| Sex           | 1            | 38             | 1.99    | 0.166   |
| Inbred Strain | 7            | 38             | 5.39    | 0.00024 |

### 14.3 Diallel analysis

Diallel analysis including batch effects and Bayesian imputation of missing sex assignments was performed as described in Methods. This diallel arose as a byproduct of another experiment, and suboptimal pairing of batches with F1 hybrid groups in the experimental design means that incorporating batch effects greatly increases uncertainty about estimated genetic parameters.

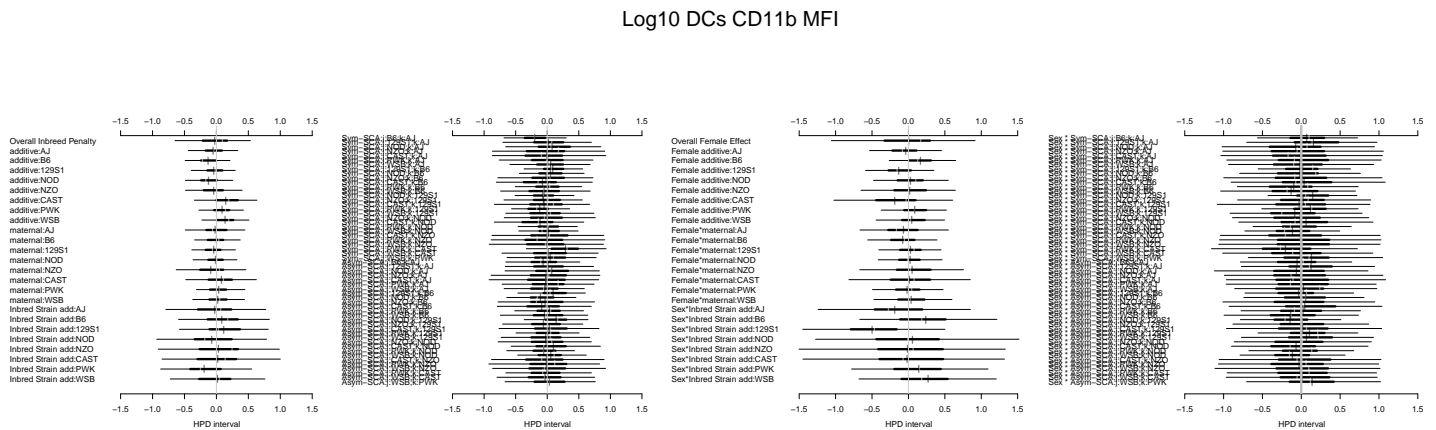

Figure 14.2: Diallel effects based on the normal model **without** accounting for batch effects on the phenotype under a log10 transformation.



Log10 DCs CD11b MFI

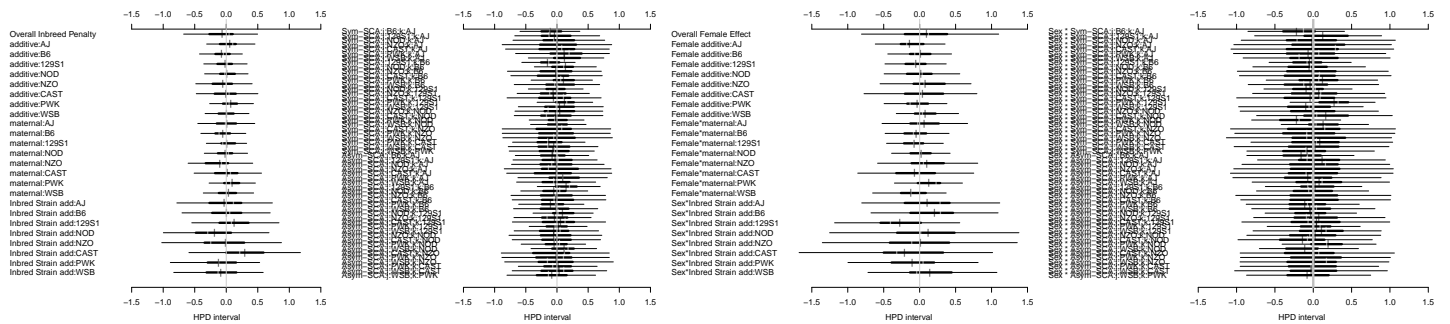

Figure 14.3: Diallel effects based on the normal model **accounting for batch** effects on the phenotype under a log10 transformation.

# Chapter 15

## DCs.CD11c.MFI: CD11c antigen density on dendritic cells

### 15.1 Data collected on DCs.CD11c.MFI

Description: CD11c antigen density on dendritic cells

Transformation: log10. Rationale for transformation: Dimensionless quantity, but Box-Cox suggests a logarithmic transformation. Log to base 10 (log10) is used to provide a more interpretable scale.

Table 15.1: Number of mice phenotyped for DCs.CD11c.MFI

|         | AJ | B6 | 129S1 | NOD | NZO | CAST | PWK | WSB | F1  | PreCC | Total |
|---------|----|----|-------|-----|-----|------|-----|-----|-----|-------|-------|
| Female  | 4  | 4  | 4     | 0   | 0   | 0    | 3   | 2   | 51  | 0     | 68    |
| Male    | 2  | 6  | 2     | 6   | 10  | 2    | 6   | 8   | 81  | 54    | 177   |
| Unsexed | 0  | 61 | 0     | 0   | 0   | 0    | 0   | 0   | 0   | 0     | 61    |
| Total   | 6  | 71 | 6     | 6   | 10  | 2    | 9   | 10  | 132 | 54    | 306   |

### 15.2 Raw and Transformed Data

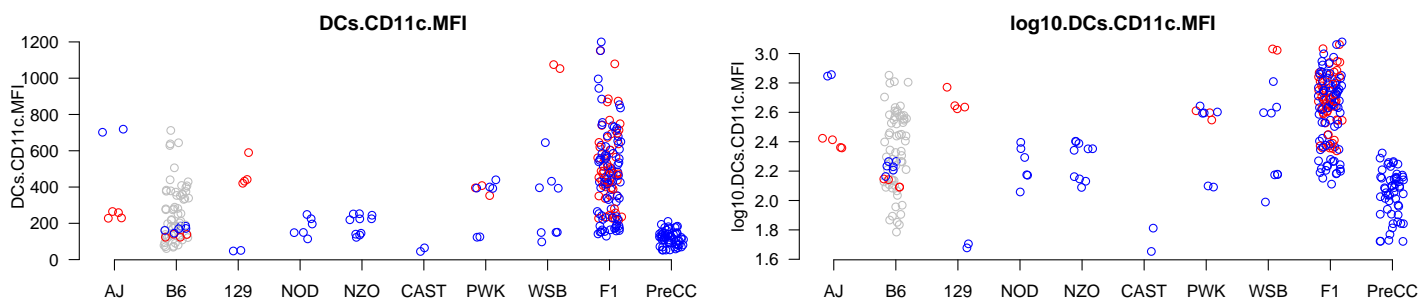

Figure 15.1: Phenotype values: raw and transformed for analysis for founder, F1 hybrid and PreCC mice. Colors distinguish females (red), males (blue), and unsexed (gray) mice.

Table 15.2: Point estimates. Upper table portion: mean and range statistics for raw phenotype values. Lower table portion: strain means and 95% CI on the transformed scale, as estimated from a linear model that includes a random intercept modeling the effects of 57 batches.

|                     | AJ   | B6   | 129S1 | NOD  | NZO  | CAST | PWK  | WSB  | F1   | PreCC |
|---------------------|------|------|-------|------|------|------|------|------|------|-------|
| Mean                | 400  | 248  | 331   | 181  | 196  | 54.9 | 337  | 454  | 484  | 119   |
| SE of Mean          | 98.3 | 17.7 | 92.5  | 21   | 16.9 | 9.92 | 40.8 | 115  | 20.5 | 5.48  |
| Min                 | 228  | 61   | 47.6  | 114  | 123  | 45   | 123  | 97.6 | 129  | 52.7  |
| Max                 | 719  | 712  | 590   | 249  | 253  | 64.9 | 440  | 1080 | 1200 | 211   |
| Modeled 95%CI Lower | 2.41 | 2.28 | 2.54  | 2.05 | 2.26 | 2.12 | 2.39 | 2.39 | 2.47 | 2.25  |
| Modeled Mean        | 2.54 | 2.35 | 2.68  | 2.22 | 2.38 | 2.34 | 2.55 | 2.51 | 2.54 | 2.35  |
| Modeled 95%CI Upper | 2.68 | 2.42 | 2.81  | 2.4  | 2.5  | 2.56 | 2.7  | 2.62 | 2.61 | 2.45  |

Table 15.3: Sequential ANOVA table of strain and sex effects, controlling for batch, in the sexed subset of tested inbred strains.

|               | numerator df | denominator df | F-value | p-value  |
|---------------|--------------|----------------|---------|----------|
| Sex           | 1            | 38             | 11      | 0.00204  |
| Inbred Strain | 7            | 38             | 22.4    | 1.13e-11 |

### 15.3 Diallel analysis

Diallel analysis including batch effects and Bayesian imputation of missing sex assignments was performed as described in Methods. This diallel arose as a byproduct of another experiment, and suboptimal pairing of batches with F1 hybrid groups in the experimental design means that incorporating batch effects greatly increases uncertainty about estimated genetic parameters.

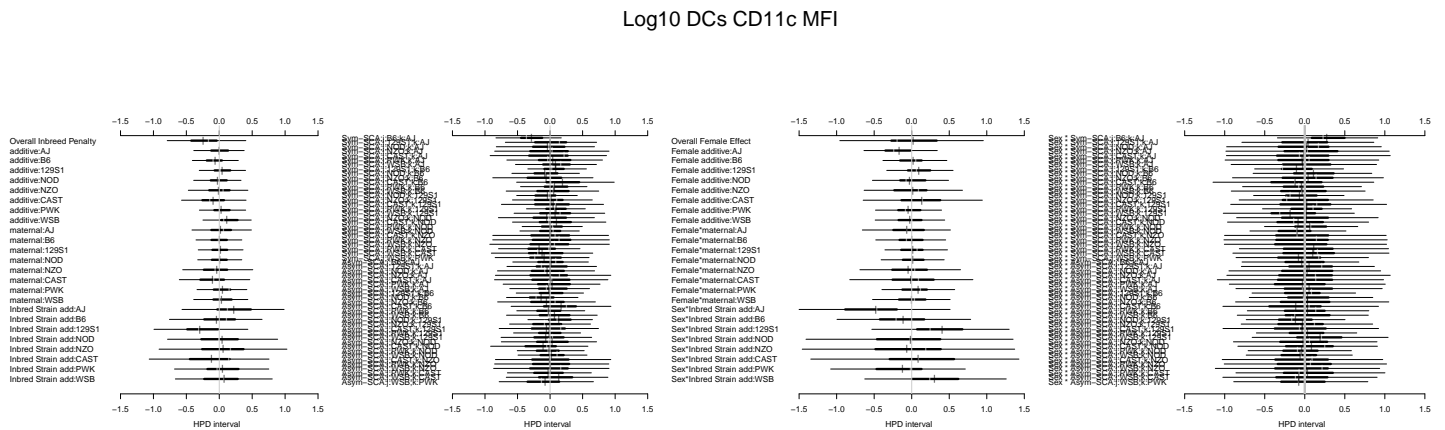

Figure 15.2: Diallel effects based on the normal model **without** accounting for batch effects on the phenotype under a log10 transformation.

Log10 DCs CD11c MFI

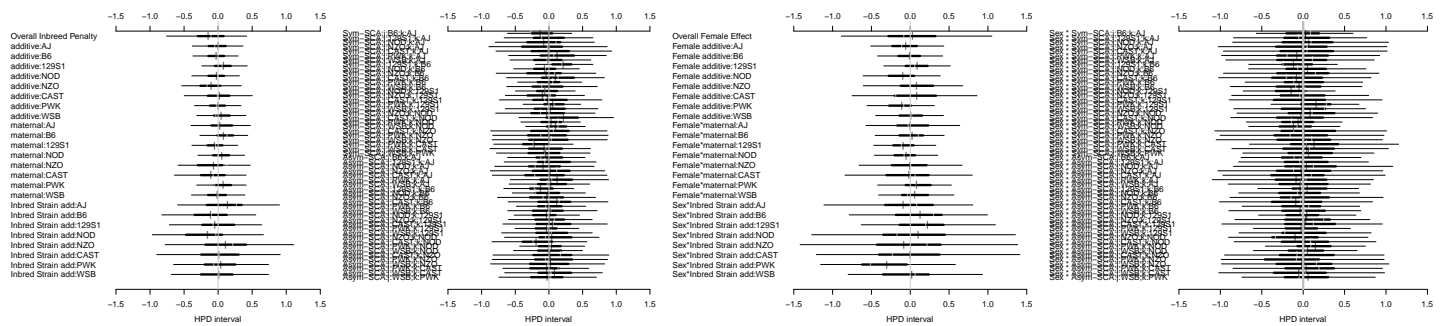

Figure 15.3: Diallel effects based on the normal model **accounting for batch effects** on the phenotype under a log10 transformation.

# Chapter 16

## DCs.Pct: Classical dendritic cells

### 16.1 Data collected on DCs.Pct

Description: Classical dendritic cells

Transformation: logit. Rationale for transformation: Natural range is a proportion between 0 and 1, so logit transformation provides an interpretable scale for effects.

Table 16.1: Number of mice phenotyped for DCs.Pct

|         | AJ | B6 | 129S1 | NOD | NZO | CAST | PWK | WSB | F1  | PreCC | Total |
|---------|----|----|-------|-----|-----|------|-----|-----|-----|-------|-------|
| Female  | 4  | 4  | 4     | 0   | 0   | 0    | 3   | 2   | 51  | 0     | 68    |
| Male    | 2  | 6  | 2     | 6   | 10  | 2    | 6   | 8   | 81  | 54    | 177   |
| Unsexed | 0  | 61 | 0     | 0   | 0   | 0    | 0   | 0   | 0   | 0     | 61    |
| Total   | 6  | 71 | 6     | 6   | 10  | 2    | 9   | 10  | 132 | 54    | 306   |

### 16.2 Raw and Transformed Data

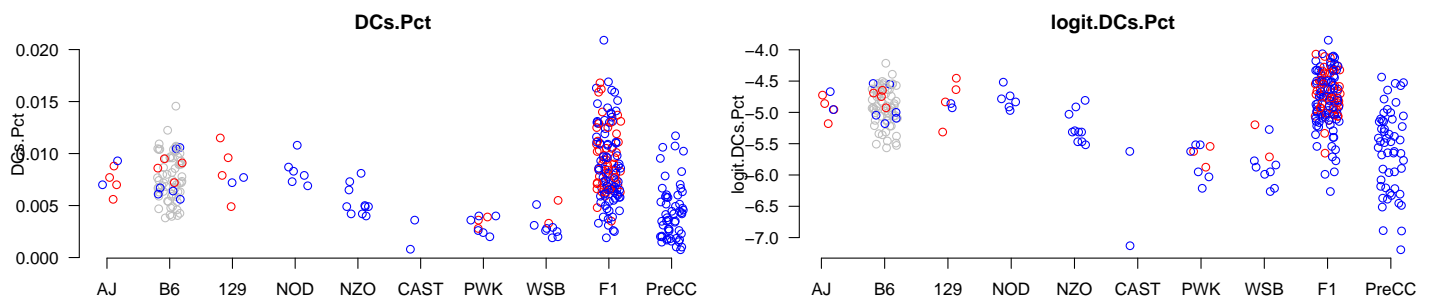

Figure 16.1: Phenotype values: raw and transformed for analysis for founder, F1 hybrid and PreCC mice. Colors distinguish females (red), males (blue), and unsexed (gray) mice.

Table 16.2: Point estimates. Upper table portion: mean and range statistics for raw phenotype values. Lower table portion: strain means and 95% CI on the transformed scale, as estimated from a linear model that includes a random intercept modeling the effects of 57 batches.

|                     | AJ       | B6       | 129S1    | NOD      | NZO      | CAST   | PWK      | WSB      | F1       | PreCC    |
|---------------------|----------|----------|----------|----------|----------|--------|----------|----------|----------|----------|
| Mean                | 0.00757  | 0.00773  | 0.00813  | 0.00832  | 0.0054   | 0.0022 | 0.00321  | 0.00317  | 0.0091   | 0.00445  |
| SE of Mean          | 0.000549 | 0.000265 | 0.000914 | 0.000564 | 0.000445 | 0.0014 | 0.000255 | 0.000382 | 0.000312 | 0.000369 |
| Min                 | 0.0056   | 0.00381  | 0.0049   | 0.0069   | 0.004    | 8e-04  | 0.002    | 0.0019   | 0.0019   | 0.00075  |
| Max                 | 0.0093   | 0.0146   | 0.0115   | 0.0108   | 0.0081   | 0.0036 | 0.004    | 0.0055   | 0.0209   | 0.0117   |
| Modeled 95%CI Lower | -5.4     | -5       | -5.19    | -5.18    | -5.38    | -6.66  | -6.08    | -5.96    | -4.9     | -5.7     |
| Modeled Mean        | -5.06    | -4.89    | -4.86    | -4.79    | -5.1     | -6.09  | -5.76    | -5.69    | -4.8     | -5.51    |
| Modeled 95%CI Upper | -4.72    | -4.78    | -4.53    | -4.39    | -4.82    | -5.52  | -5.43    | -5.43    | -4.7     | -5.33    |

Table 16.3: Sequential ANOVA table of strain and sex effects, controlling for batch, in the sexed subset of tested inbred strains.

|               | numerator df | denominator df | F-value | p-value  |
|---------------|--------------|----------------|---------|----------|
| Sex           | 1            | 38             | 3.14    | 0.0846   |
| Inbred Strain | 7            | 38             | 16.1    | 1.31e-09 |

### 16.3 Diallel analysis

Diallel analysis including batch effects and Bayesian imputation of missing sex assignments was performed as described in Methods. This diallel arose as a byproduct of another experiment, and suboptimal pairing of batches with F1 hybrid groups in the experimental design means that incorporating batch effects greatly increases uncertainty about estimated genetic parameters.

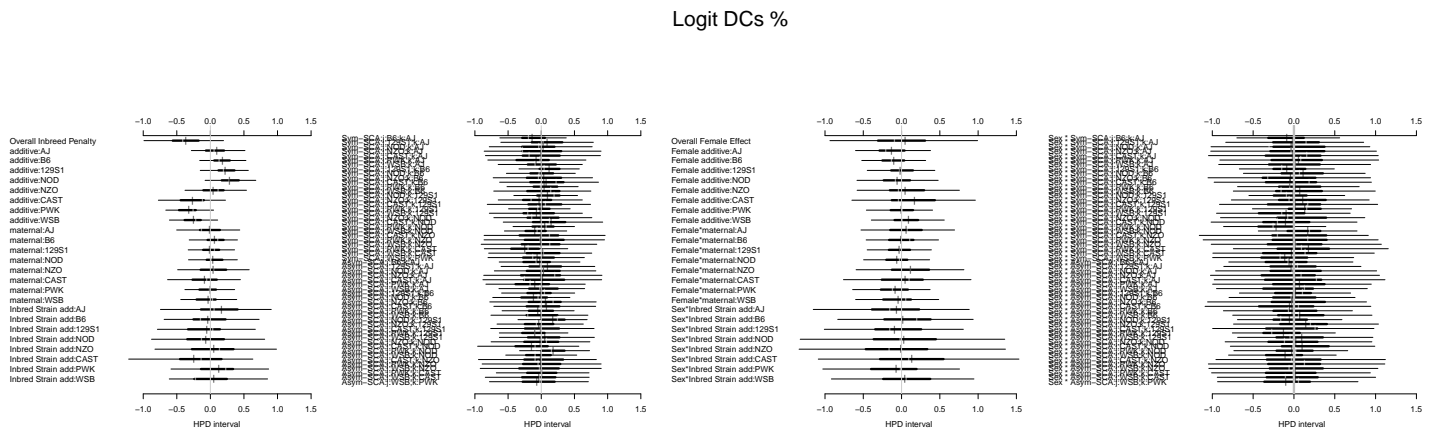

Figure 16.2: Diallel effects based on the normal model **without** accounting for batch effects on the phenotype under a logit transformation.

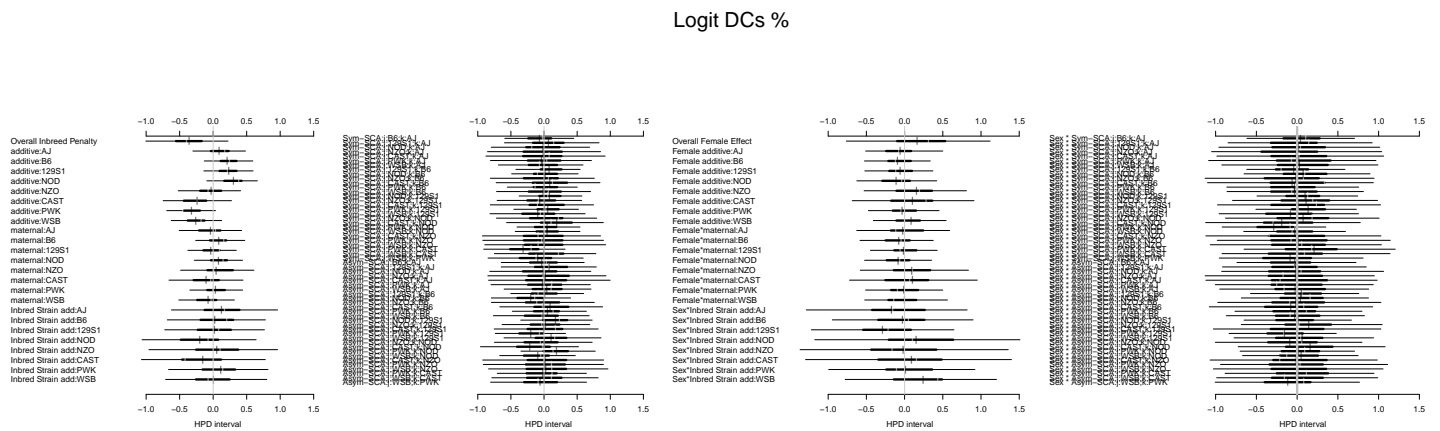

Figure 16.3: Diallel effects based on the normal model **accounting for batch** effects on the phenotype under a logit transformation.

# Chapter 17

## FoB.Pct.CD19: Follicular B-cells (CD19+)

### 17.1 Data collected on FoB.Pct.CD19

Description: Follicular B-cells (CD19+)

Transformation: INT. Rationale for transformation: Although natural range is between 0 and 1, outliers and small sample size make a logit transformation unstable for subsequent Gaussian-based analysis. Therefore, the inverse normal transformation using the Bliss correction is used instead.

Table 17.1: Number of mice phenotyped for FoB.Pct.CD19

|         | AJ | B6 | 129S1 | NOD | NZO | CAST | PWK | WSB | F1  | PreCC | Total |
|---------|----|----|-------|-----|-----|------|-----|-----|-----|-------|-------|
| Female  | 4  | 4  | 4     | 0   | 0   | 0    | 3   | 2   | 51  | 0     | 68    |
| Male    | 2  | 6  | 2     | 6   | 10  | 2    | 6   | 8   | 81  | 40    | 163   |
| Unsexed | 0  | 58 | 0     | 0   | 0   | 0    | 0   | 0   | 0   | 0     | 58    |
| Total   | 6  | 68 | 6     | 6   | 10  | 2    | 9   | 10  | 132 | 40    | 289   |

### 17.2 Raw and Transformed Data

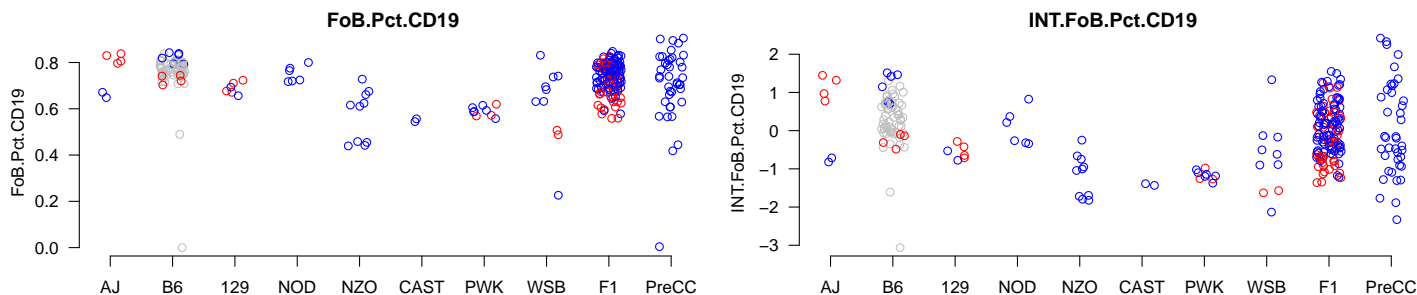

Figure 17.1: Phenotype values: raw and transformed for analysis for founder, F1 hybrid and PreCC mice. Colors distinguish females (red), males (blue), and unsexed (gray) mice.



Table 17.2: Point estimates. Upper table portion: mean and range statistics for raw phenotype values. Lower table portion: strain means and 95% CI on the transformed scale, as estimated from a linear model that includes a random intercept modeling the effects of 56 batches.

|                     | AJ    | B6     | 129S1  | NOD     | NZO    | CAST    | PWK     | WSB       | F1      | PreCC   |
|---------------------|-------|--------|--------|---------|--------|---------|---------|-----------|---------|---------|
| Mean                | 0.765 | 0.759  | 0.689  | 0.75    | 0.571  | 0.551   | 0.59    | 0.617     | 0.736   | 0.707   |
| SE of Mean          | 0.034 | 0.0127 | 0.0103 | 0.0141  | 0.035  | 0.00605 | 0.00708 | 0.0546    | 0.00562 | 0.0257  |
| Min                 | 0.648 | 0      | 0.656  | 0.718   | 0.44   | 0.544   | 0.557   | 0.226     | 0.559   | 0.00416 |
| Max                 | 0.838 | 0.843  | 0.723  | 0.8     | 0.728  | 0.557   | 0.62    | 0.832     | 0.848   | 0.906   |
| Modeled 95%CI Lower | -0.22 | 0.125  | -1.36  | -0.738  | -1.43  | -2.19   | -1.67   | -1.03     | -0.21   | -0.47   |
| Modeled Mean        | 0.394 | 0.325  | -0.753 | -0.0249 | -0.918 | -1.16   | -1.08   | -0.518    | -0.0269 | -0.1    |
| Modeled 95%CI Upper | 1.01  | 0.526  | -0.152 | 0.688   | -0.409 | -0.132  | -0.497  | -0.000574 | 0.157   | 0.269   |

Table 17.3: Sequential ANOVA table of strain and sex effects, controlling for batch, in the sexed subset of tested inbred strains.

|               | numerator df | denominator df | F-value | p-value  |
|---------------|--------------|----------------|---------|----------|
| Sex           | 1            | 38             | 2.44    | 0.127    |
| Inbred Strain | 7            | 38             | 9.63    | 7.88e-07 |

### 17.3 Diallel analysis

Diallel analysis including batch effects and Bayesian imputation of missing sex assignments was performed as described in Methods. This diallel arose as a byproduct of another experiment, and suboptimal pairing of batches with F1 hybrid groups in the experimental design means that incorporating batch effects greatly increases uncertainty about estimated genetic parameters.

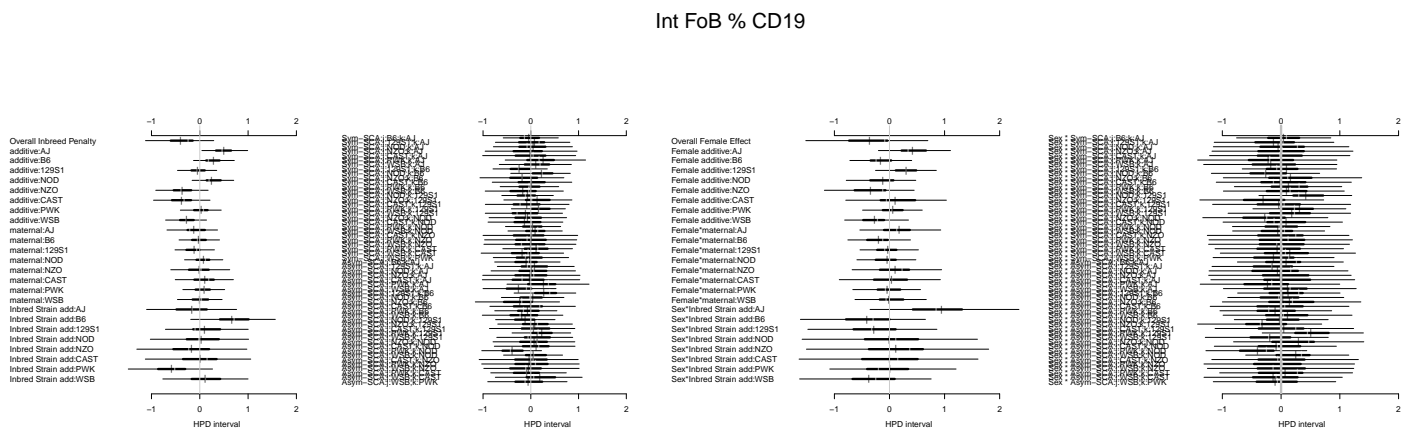

Figure 17.2: Diallel effects based on the normal model **without** accounting for batch effects on the phenotype under an INT transformation.

Int FoB % CD19

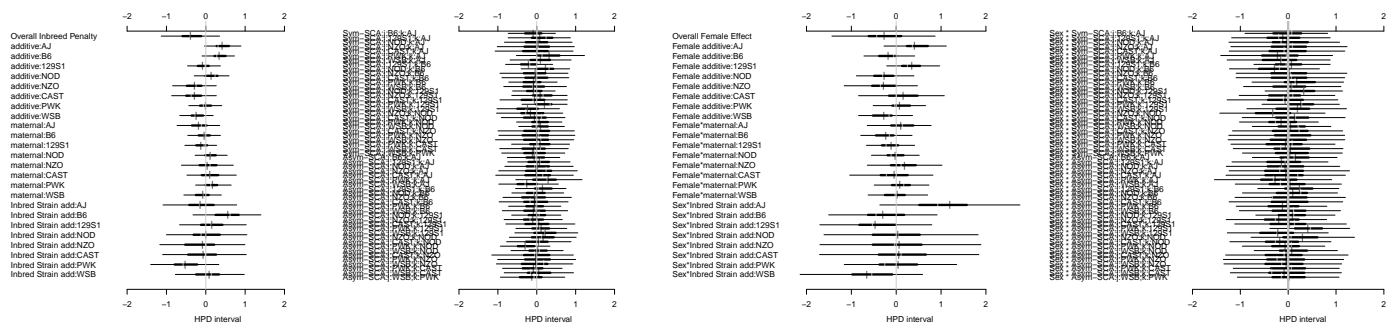

Figure 17.3: Diallel effects based on the normal model **accounting for batch** effects on the phenotype under a INT transformation.

# Chapter 18

## Granulocytes.Pct: Granulocytes

### 18.1 Data collected on Granulocytes.Pct

Description: Granulocytes

Transformation: logit. Rationale for transformation: Natural range is a proportion between 0 and 1, so logit transformation provides an interpretable scale for effects.

Table 18.1: Number of mice phenotyped for Granulocytes.Pct

|         | AJ | B6 | 129S1 | NOD | NZO | CAST | PWK | WSB | F1  | PreCC | Total |
|---------|----|----|-------|-----|-----|------|-----|-----|-----|-------|-------|
| Female  | 4  | 4  | 4     | 0   | 0   | 0    | 3   | 2   | 51  | 0     | 68    |
| Male    | 2  | 6  | 2     | 6   | 10  | 2    | 6   | 8   | 81  | 54    | 177   |
| Unsexed | 0  | 61 | 0     | 0   | 0   | 0    | 0   | 0   | 0   | 0     | 61    |
| Total   | 6  | 71 | 6     | 6   | 10  | 2    | 9   | 10  | 132 | 54    | 306   |

### 18.2 Raw and Transformed Data

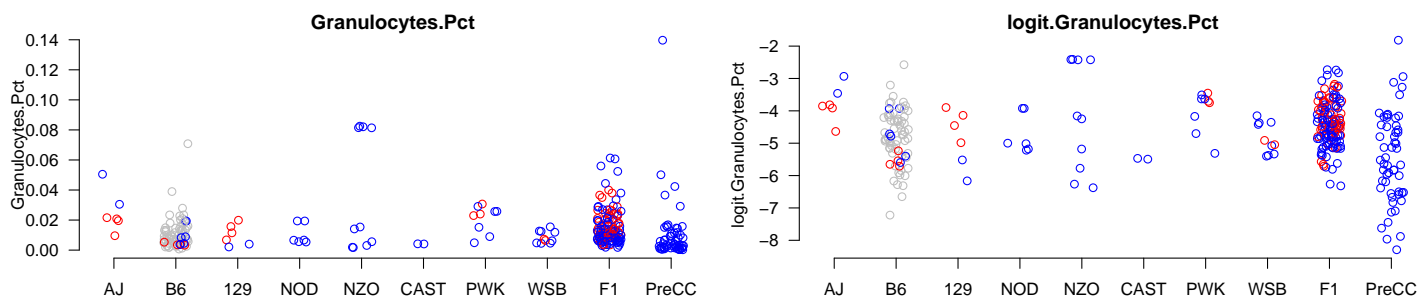

Figure 18.1: Phenotype values: raw and transformed for analysis for founder, F1 hybrid and PreCC mice. Colors distinguish females (red), males (blue), and unsexed (gray) mice.

Table 18.2: Point estimates. Upper table portion: mean and range statistics for raw phenotype values. Lower table portion: strain means and 95% CI on the transformed scale, as estimated from a linear model that includes a random intercept modeling the effects of 57 batches.

|                     | AJ     | B6      | 129S1   | NOD     | NZO    | CAST    | PWK     | WSB     | F1      | PreCC    |
|---------------------|--------|---------|---------|---------|--------|---------|---------|---------|---------|----------|
| Mean                | 0.0254 | 0.0109  | 0.01    | 0.0105  | 0.0369 | 0.00415 | 0.0208  | 0.00864 | 0.0154  | 0.0106   |
| SE of Mean          | 0.0057 | 0.00121 | 0.00284 | 0.00282 | 0.0123 | 5e-05   | 0.00301 | 0.00129 | 0.00101 | 0.00282  |
| Min                 | 0.0096 | 0.00073 | 0.0021  | 0.0054  | 0.0017 | 0.0041  | 0.0049  | 0.0045  | 0.0018  | 0.000251 |
| Max                 | 0.0505 | 0.0708  | 0.0199  | 0.0194  | 0.0825 | 0.0042  | 0.0307  | 0.0155  | 0.0613  | 0.14     |
| Modeled 95%CI Lower | -4.36  | -5.04   | -5.28   | -5.55   | -4.99  | -6.3    | -4.82   | -5.31   | -4.57   | -5.71    |
| Modeled Mean        | -3.64  | -4.81   | -4.58   | -4.73   | -4.4   | -5.1    | -4.14   | -4.75   | -4.36   | -5.33    |
| Modeled 95%CI Upper | -2.93  | -4.59   | -3.88   | -3.9    | -3.81  | -3.9    | -3.46   | -4.18   | -4.15   | -4.95    |

Table 18.3: Sequential ANOVA table of strain and sex effects, controlling for batch, in the sexed subset of tested inbred strains.

|               | numerator df | denominator df | F-value | p-value  |
|---------------|--------------|----------------|---------|----------|
| Sex           | 1            | 38             | 19.8    | 7.23e-05 |
| Inbred Strain | 7            | 38             | 2.41    | 0.0381   |

### 18.3 Diallel analysis

Diallel analysis including batch effects and Bayesian imputation of missing sex assignments was performed as described in Methods. This diallel arose as a byproduct of another experiment, and suboptimal pairing of batches with F1 hybrid groups in the experimental design means that incorporating batch effects greatly increases uncertainty about estimated genetic parameters.

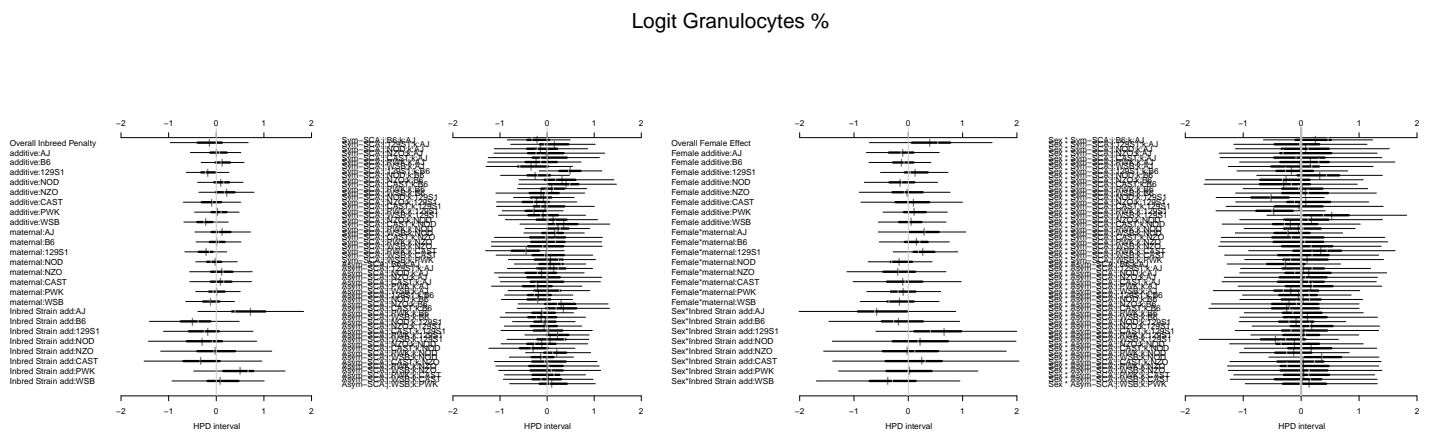

Figure 18.2: Diallel effects based on the normal model **without** accounting for batch effects on the phenotype under a logit transformation.

Logit Granulocytes %

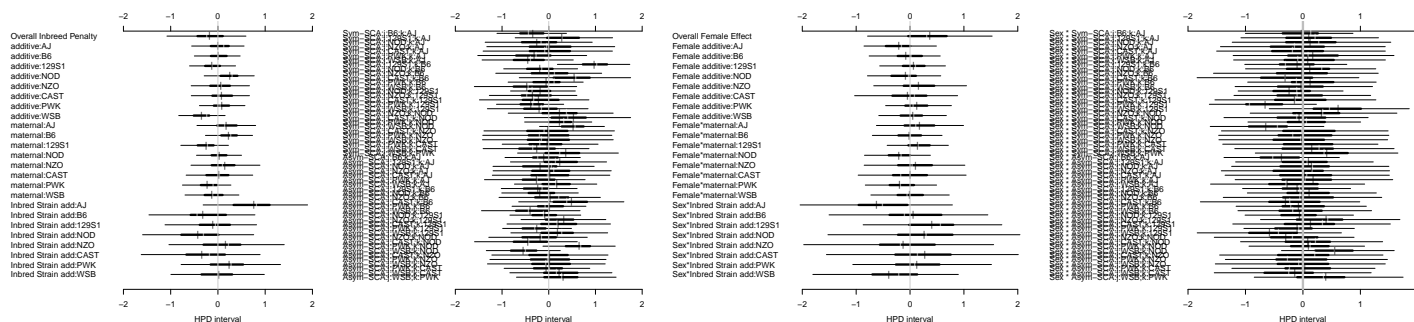

Figure 18.3: Diallelic effects based on the normal model **accounting for batch** effects on the phenotype under a logit transformation.

# Chapter 19

## H57.Pct: Total T-cells (H57+)

### 19.1 Data collected on H57.Pct

Description: Total T-cells (H57+)

Transformation: logit. Rationale for transformation: Natural range is a proportion between 0 and 1, so logit transformation provides an interpretable scale for effects.

Table 19.1: Number of mice phenotyped for H57.Pct

|         | AJ | B6 | 129S1 | NOD | NZO | CAST | PWK | WSB | F1  | PreCC | Total |
|---------|----|----|-------|-----|-----|------|-----|-----|-----|-------|-------|
| Female  | 4  | 4  | 4     | 0   | 0   | 0    | 3   | 2   | 51  | 0     | 68    |
| Male    | 2  | 6  | 2     | 6   | 10  | 2    | 6   | 8   | 81  | 66    | 189   |
| Unsexed | 0  | 62 | 0     | 0   | 0   | 0    | 0   | 0   | 0   | 0     | 62    |
| Total   | 6  | 72 | 6     | 6   | 10  | 2    | 9   | 10  | 132 | 66    | 319   |

### 19.2 Raw and Transformed Data

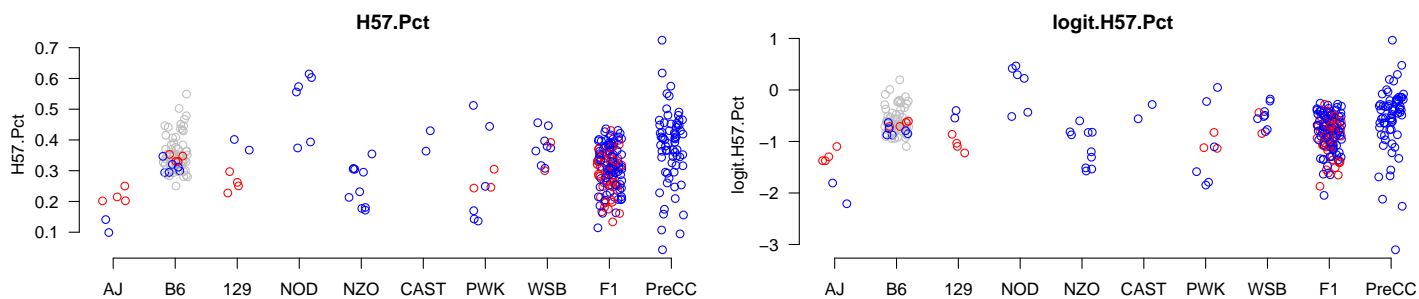

Figure 19.1: Phenotype values: raw and transformed for analysis for founder, F1 hybrid and PreCC mice. Colors distinguish females (red), males (blue), and unsexed (gray) mice.

Table 19.2: Point estimates. Upper table portion: mean and range statistics for raw phenotype values. Lower table portion: strain means and 95% CI on the transformed scale, as estimated from a linear model that includes a random intercept modeling the effects of 57 batches.

|                     | AJ     | B6      | 129S1  | NOD    | NZO    | CAST   | PWK    | WSB    | F1      | PreCC  |
|---------------------|--------|---------|--------|--------|--------|--------|--------|--------|---------|--------|
| Mean                | 0.185  | 0.353   | 0.301  | 0.519  | 0.254  | 0.397  | 0.272  | 0.373  | 0.306   | 0.376  |
| SE of Mean          | 0.0224 | 0.00683 | 0.0282 | 0.0437 | 0.0211 | 0.0331 | 0.0434 | 0.017  | 0.00629 | 0.0149 |
| Min                 | 0.099  | 0.25    | 0.228  | 0.374  | 0.172  | 0.364  | 0.136  | 0.3    | 0.114   | 0.043  |
| Max                 | 0.25   | 0.549   | 0.402  | 0.615  | 0.354  | 0.43   | 0.512  | 0.456  | 0.436   | 0.724  |
| Modeled 95%CI Lower | -1.92  | -0.709  | -1.42  | -0.333 | -1.23  | -1.39  | -1.35  | -0.818 | -0.961  | -0.775 |
| Modeled Mean        | -1.58  | -0.605  | -1.09  | 0.0498 | -0.954 | -0.813 | -1.03  | -0.551 | -0.867  | -0.615 |
| Modeled 95%CI Upper | -1.24  | -0.501  | -0.751 | 0.433  | -0.673 | -0.238 | -0.72  | -0.283 | -0.774  | -0.456 |

Table 19.3: Sequential ANOVA table of strain and sex effects, controlling for batch, in the sexed subset of tested inbred strains.

|               | numerator df | denominator df | F-value | p-value  |
|---------------|--------------|----------------|---------|----------|
| Sex           | 1            | 38             | 40.3    | 1.91e-07 |
| Inbred Strain | 7            | 38             | 5.52    | 0.000195 |

### 19.3 Diallel analysis

Diallel analysis including batch effects and Bayesian imputation of missing sex assignments was performed as described in Methods. This diallel arose as a byproduct of another experiment, and suboptimal pairing of batches with F1 hybrid groups in the experimental design means that incorporating batch effects greatly increases uncertainty about estimated genetic parameters.

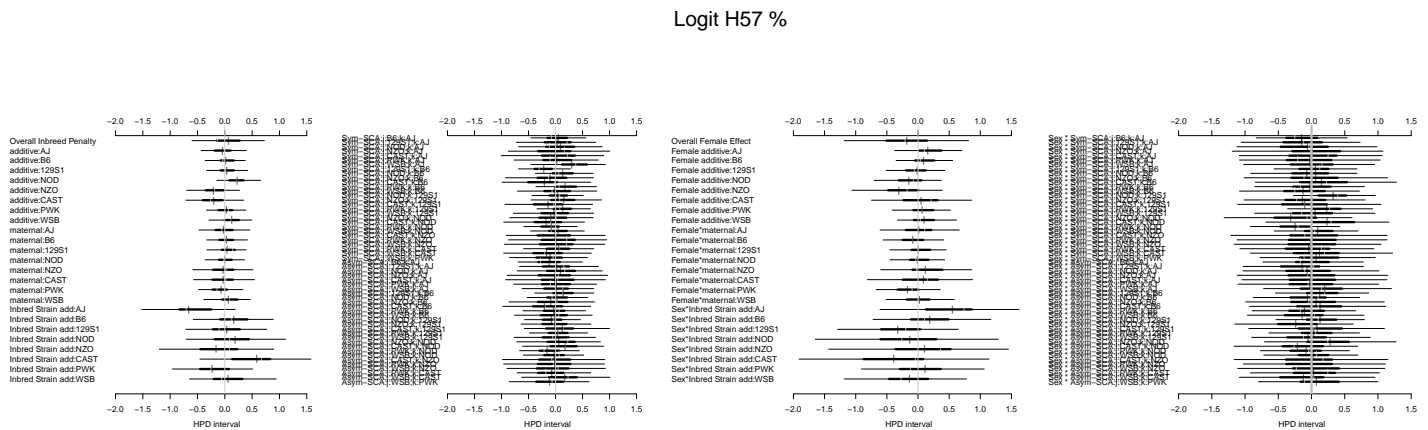

Figure 19.2: Diallel effects based on the normal model **without** accounting for batch effects on the phenotype under a logit transformation.

Logit H57 %

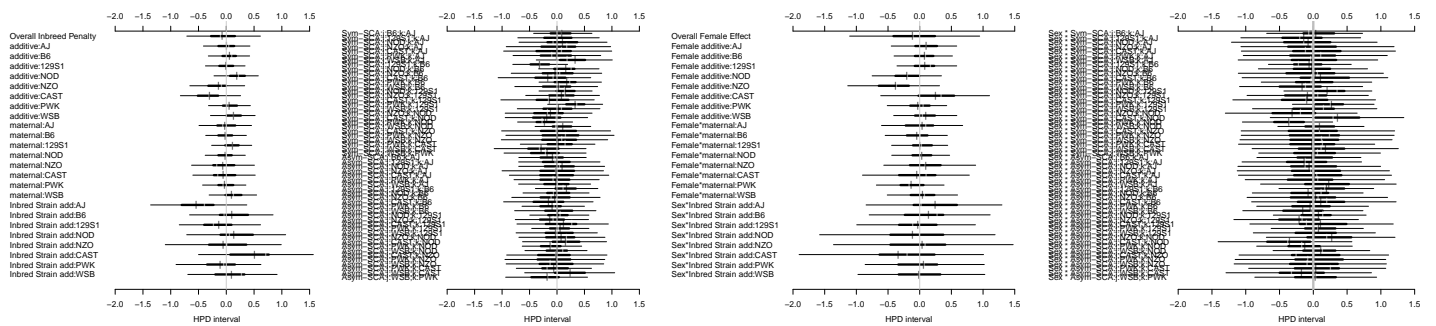

Figure 19.3: Diallel effects based on the normal model **accounting for batch** effects on the phenotype under a logit transformation.



# Chapter 20

## Macrophages.Pct: Macrophages

### 20.1 Data collected on Macrophages.Pct

Description: Macrophages

Transformation: logit. Rationale for transformation: Natural range is a proportion between 0 and 1, so logit transformation provides an interpretable scale for effects.

Table 20.1: Number of mice phenotyped for Macrophages.Pct

|         | AJ | B6 | 129S1 | NOD | NZO | CAST | PWK | WSB | F1  | PreCC | Total |
|---------|----|----|-------|-----|-----|------|-----|-----|-----|-------|-------|
| Female  | 4  | 4  | 4     | 0   | 0   | 0    | 3   | 2   | 51  | 0     | 68    |
| Male    | 2  | 6  | 2     | 6   | 10  | 2    | 6   | 8   | 81  | 54    | 177   |
| Unsexed | 0  | 61 | 0     | 0   | 0   | 0    | 0   | 0   | 0   | 0     | 61    |
| Total   | 6  | 71 | 6     | 6   | 10  | 2    | 9   | 10  | 132 | 54    | 306   |

### 20.2 Raw and Transformed Data

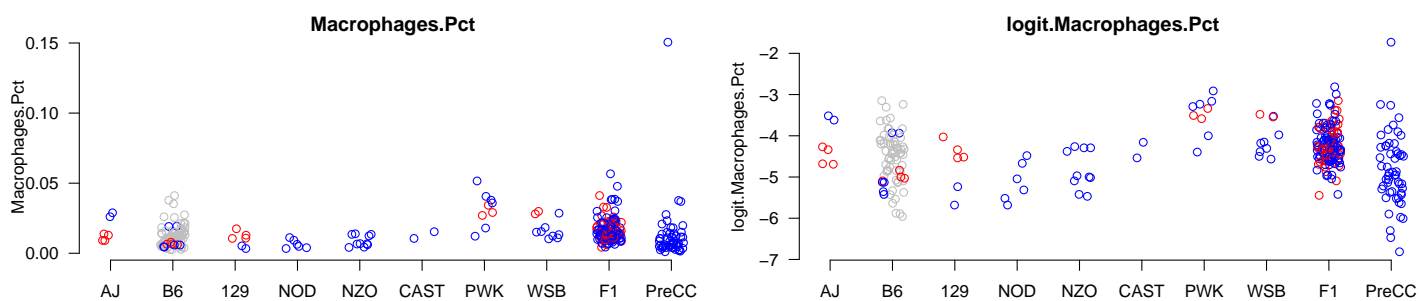

Figure 20.1: Phenotype values: raw and transformed for analysis for founder, F1 hybrid and PreCC mice. Colors distinguish females (red), males (blue), and unsexed (gray) mice.

Table 20.2: Point estimates. Upper table portion: mean and range statistics for raw phenotype values. Lower table portion: strain means and 95% CI on the transformed scale, as estimated from a linear model that includes a random intercept modeling the effects of 57 batches.

|                     | AJ      | B6      | 129S1   | NOD     | NZO     | CAST   | PWK     | WSB     | F1       | PreCC   |
|---------------------|---------|---------|---------|---------|---------|--------|---------|---------|----------|---------|
| Mean                | 0.0167  | 0.0125  | 0.0101  | 0.00653 | 0.00882 | 0.013  | 0.0318  | 0.0182  | 0.0164   | 0.0125  |
| SE of Mean          | 0.00353 | 0.00095 | 0.00209 | 0.00127 | 0.00126 | 0.0024 | 0.00397 | 0.00243 | 0.000748 | 0.00282 |
| Min                 | 0.0091  | 0.00258 | 0.0034  | 0.0034  | 0.0042  | 0.0106 | 0.0122  | 0.0103  | 0.0043   | 0.0011  |
| Max                 | 0.0289  | 0.0412  | 0.0175  | 0.0112  | 0.0139  | 0.0154 | 0.0516  | 0.0299  | 0.0567   | 0.151   |
| Modeled 95%CI Lower | -4.72   | -4.68   | -5.01   | -5.69   | -5.05   | -4.85  | -3.86   | -4.56   | -4.36    | -5.08   |
| Modeled Mean        | -4.23   | -4.53   | -4.53   | -5.13   | -4.65   | -4.03  | -3.4    | -4.18   | -4.22    | -4.82   |
| Modeled 95%CI Upper | -3.74   | -4.37   | -4.05   | -4.58   | -4.25   | -3.21  | -2.94   | -3.8    | -4.08    | -4.56   |

Table 20.3: Sequential ANOVA table of strain and sex effects, controlling for batch, in the sexed subset of tested inbred strains.

|               | numerator df | denominator df | F-value | p-value  |
|---------------|--------------|----------------|---------|----------|
| Sex           | 1            | 38             | 0.313   | 0.579    |
| Inbred Strain | 7            | 38             | 6.49    | 4.63e-05 |

### 20.3 Diallel analysis

Diallel analysis including batch effects and Bayesian imputation of missing sex assignments was performed as described in Methods. This diallel arose as a byproduct of another experiment, and suboptimal pairing of batches with F1 hybrid groups in the experimental design means that incorporating batch effects greatly increases uncertainty about estimated genetic parameters.

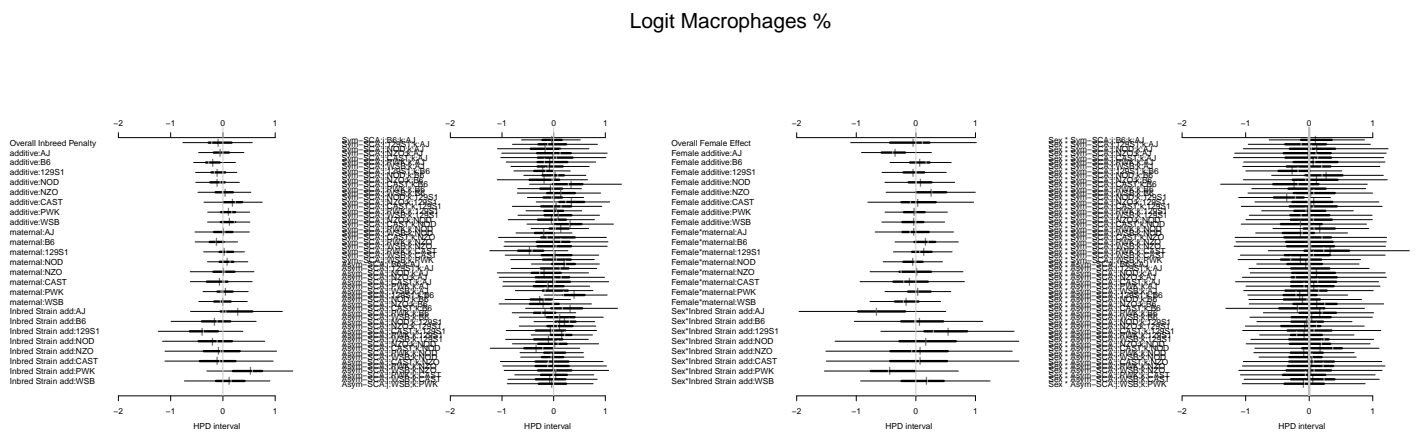

Figure 20.2: Diallel effects based on the normal model **without** accounting for batch effects on the phenotype under a logit transformation.

Logit Macrophages %

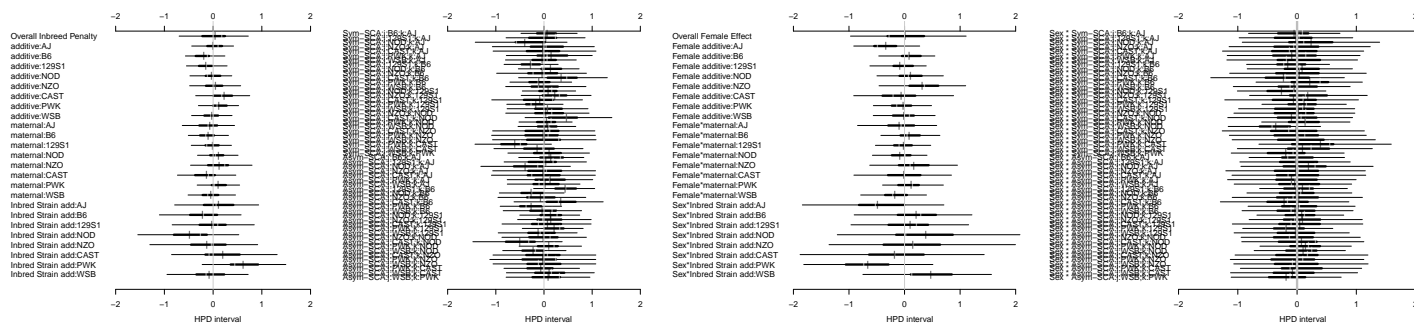

Figure 20.3: Diallel effects based on the normal model **accounting for batch** effects on the phenotype under a logit transformation.

# Chapter 21

## Monocytes.Pct: Monocytes

### 21.1 Data collected on Monocytes.Pct

Description: Monocytes

Transformation: logit. Rationale for transformation: Natural range is a proportion between 0 and 1, so logit transformation provides an interpretable scale for effects.

Table 21.1: Number of mice phenotyped for Monocytes.Pct

|         | AJ | B6 | 129S1 | NOD | NZO | CAST | PWK | WSB | F1  | PreCC | Total |
|---------|----|----|-------|-----|-----|------|-----|-----|-----|-------|-------|
| Female  | 4  | 4  | 4     | 0   | 0   | 0    | 3   | 2   | 51  | 0     | 68    |
| Male    | 2  | 6  | 2     | 6   | 10  | 2    | 6   | 8   | 81  | 54    | 177   |
| Unsexed | 0  | 61 | 0     | 0   | 0   | 0    | 0   | 0   | 0   | 0     | 61    |
| Total   | 6  | 71 | 6     | 6   | 10  | 2    | 9   | 10  | 132 | 54    | 306   |

### 21.2 Raw and Transformed Data

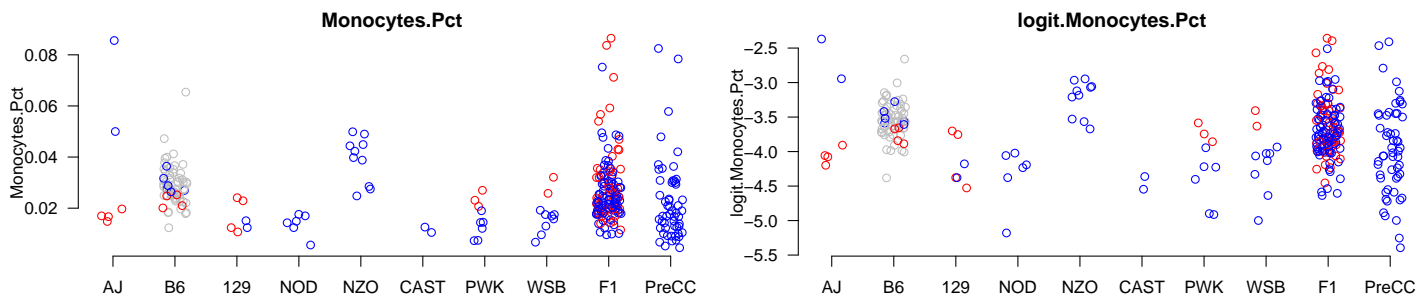

Figure 21.1: Phenotype values: raw and transformed for analysis for founder, F1 hybrid and PreCC mice. Colors distinguish females (red), males (blue), and unsexed (gray) mice.

Table 21.2: Point estimates. Upper table portion: mean and range statistics for raw phenotype values. Lower table portion: strain means and 95% CI on the transformed scale, as estimated from a linear model that includes a random intercept modeling the effects of 57 batches.

|                     | AJ     | B6       | 129S1   | NOD     | NZO     | CAST    | PWK     | WSB     | F1      | PreCC   |
|---------------------|--------|----------|---------|---------|---------|---------|---------|---------|---------|---------|
| Mean                | 0.034  | 0.0288   | 0.0163  | 0.0136  | 0.039   | 0.0116  | 0.0162  | 0.0174  | 0.0275  | 0.0226  |
| SE of Mean          | 0.0117 | 0.000895 | 0.00236 | 0.00178 | 0.00286 | 0.00105 | 0.00227 | 0.00233 | 0.00117 | 0.00219 |
| Min                 | 0.0148 | 0.0124   | 0.0107  | 0.0056  | 0.0248  | 0.0105  | 0.0073  | 0.0067  | 0.0096  | 0.00452 |
| Max                 | 0.0856 | 0.0654   | 0.0241  | 0.0176  | 0.0499  | 0.0126  | 0.027   | 0.0321  | 0.0865  | 0.0825  |
| Modeled 95%CI Lower | -3.95  | -3.65    | -4.31   | -4.71   | -3.58   | -4.89   | -4.59   | -4.5    | -3.74   | -4.13   |
| Modeled Mean        | -3.59  | -3.54    | -3.96   | -4.3    | -3.28   | -4.27   | -4.26   | -4.21   | -3.64   | -3.94   |
| Modeled 95%CI Upper | -3.22  | -3.43    | -3.6    | -3.89   | -2.98   | -3.66   | -3.92   | -3.92   | -3.54   | -3.76   |

Table 21.3: Sequential ANOVA table of strain and sex effects, controlling for batch, in the sexed subset of tested inbred strains.

|               | numerator df | denominator df | F-value | p-value |
|---------------|--------------|----------------|---------|---------|
| Sex           | 1            | 38             | 7.42    | 0.00971 |
| Inbred Strain | 7            | 38             | 11      | 1.6e-07 |

### 21.3 Diallel analysis

Diallel analysis including batch effects and Bayesian imputation of missing sex assignments was performed as described in Methods. This diallel arose as a byproduct of another experiment, and suboptimal pairing of batches with F1 hybrid groups in the experimental design means that incorporating batch effects greatly increases uncertainty about estimated genetic parameters.

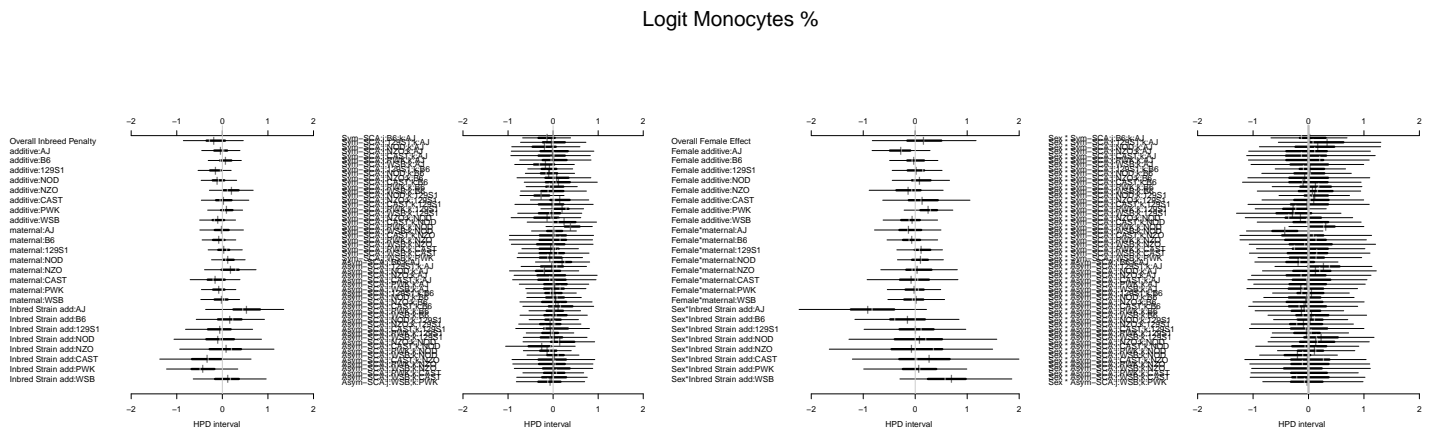

Figure 21.2: Diallel effects based on the normal model **without** accounting for batch effects on the phenotype under a logit transformation.

Logit Monocytes %

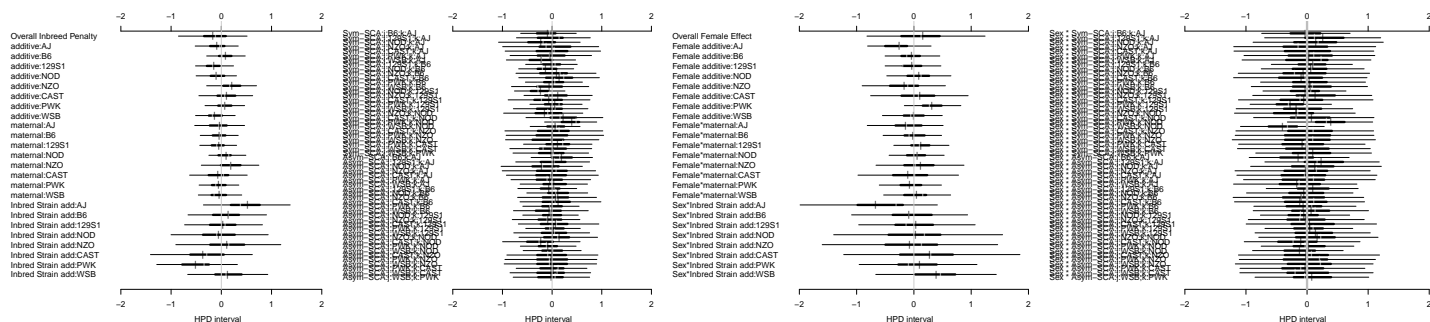

Figure 21.3: Diallel effects based on the normal model **accounting for batch** effects on the phenotype under a logit transformation.

## Chapter 22

# Phagocytes.Pct: Phagocytes (CD11b Hi)

### 22.1 Data collected on Phagocytes.Pct

Description: Phagocytes (CD11b Hi)

Transformation: logit. Rationale for transformation: Natural range is a proportion between 0 and 1, so logit transformation provides an interpretable scale for effects.

Table 22.1: Number of mice phenotyped for Phagocytes.Pct

|         | AJ | B6 | 129S1 | NOD | NZO | CAST | PWK | WSB | F1  | PreCC | Total |
|---------|----|----|-------|-----|-----|------|-----|-----|-----|-------|-------|
| Female  | 4  | 4  | 4     | 0   | 0   | 0    | 3   | 2   | 51  | 0     | 68    |
| Male    | 2  | 6  | 2     | 6   | 10  | 2    | 6   | 8   | 81  | 54    | 177   |
| Unsexed | 0  | 61 | 0     | 0   | 0   | 0    | 0   | 0   | 0   | 0     | 61    |
| Total   | 6  | 71 | 6     | 6   | 10  | 2    | 9   | 10  | 132 | 54    | 306   |

### 22.2 Raw and Transformed Data

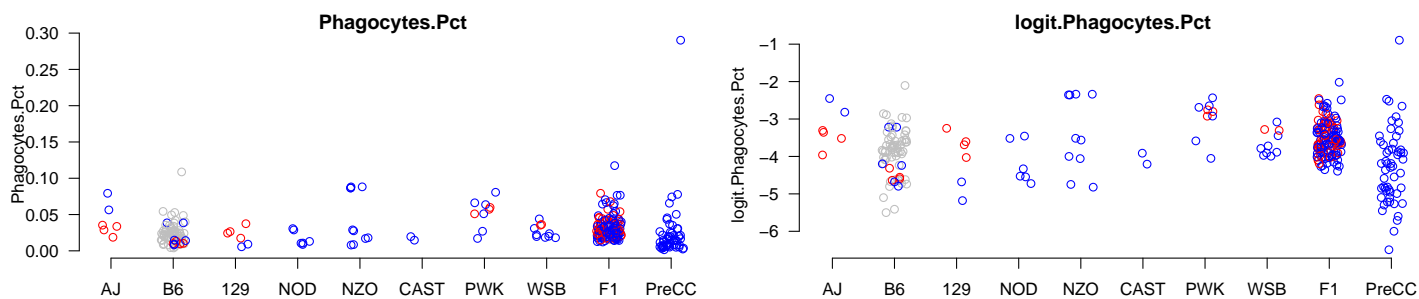

Figure 22.1: Phenotype values: raw and transformed for analysis for founder, F1 hybrid and PreCC mice. Colors distinguish females (red), males (blue), and unsexed (gray) mice.

Table 22.2: Point estimates. Upper table portion: mean and range statistics for raw phenotype values. Lower table portion: strain means and 95% CI on the transformed scale, as estimated from a linear model that includes a random intercept modeling the effects of 57 batches.

|                     | AJ     | B6      | 129S1   | NOD     | NZO    | CAST    | PWK     | WSB     | F1      | PreCC   |
|---------------------|--------|---------|---------|---------|--------|---------|---------|---------|---------|---------|
| Mean                | 0.042  | 0.0235  | 0.0201  | 0.0171  | 0.0458 | 0.0172  | 0.0527  | 0.0269  | 0.0318  | 0.0239  |
| SE of Mean          | 0.009  | 0.00184 | 0.00481 | 0.00404 | 0.0115 | 0.00245 | 0.00655 | 0.00288 | 0.00142 | 0.00556 |
| Min                 | 0.0187 | 0.00407 | 0.0056  | 0.0088  | 0.008  | 0.0147  | 0.0171  | 0.0181  | 0.0122  | 0.00151 |
| Max                 | 0.0793 | 0.109   | 0.0374  | 0.0306  | 0.0882 | 0.0196  | 0.0807  | 0.044   | 0.117   | 0.29    |
| Modeled 95%CI Lower | -3.69  | -4.04   | -4.32   | -4.73   | -3.92  | -4.59   | -3.51   | -4.05   | -3.66   | -4.47   |
| Modeled Mean        | -3.17  | -3.88   | -3.81   | -4.14   | -3.49  | -3.73   | -3.03   | -3.64   | -3.51   | -4.2    |
| Modeled 95%CI Upper | -2.66  | -3.72   | -3.31   | -3.55   | -3.07  | -2.86   | -2.55   | -3.23   | -3.36   | -3.93   |

Table 22.3: Sequential ANOVA table of strain and sex effects, controlling for batch, in the sexed subset of tested inbred strains.

|               | numerator df | denominator df | F-value | p-value |
|---------------|--------------|----------------|---------|---------|
| Sex           | 1            | 38             | 4.66    | 0.0373  |
| Inbred Strain | 7            | 38             | 3.89    | 0.00275 |

## 22.3 Diallel analysis

Diallel analysis including batch effects and Bayesian imputation of missing sex assignments was performed as described in Methods. This diallel arose as a byproduct of another experiment, and suboptimal pairing of batches with F1 hybrid groups in the experimental design means that incorporating batch effects greatly increases uncertainty about estimated genetic parameters.

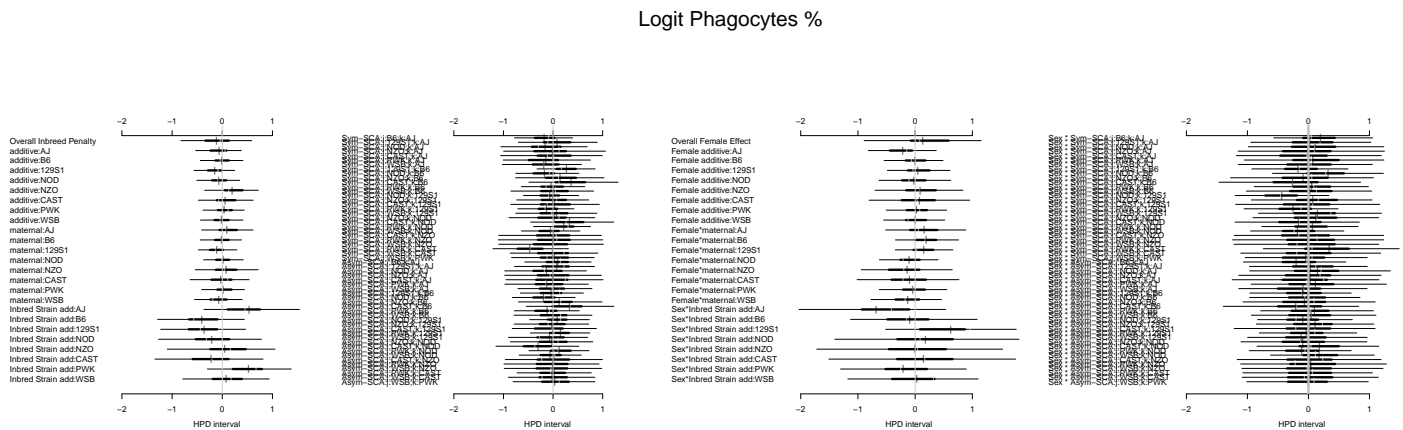

Figure 22.2: Diallel effects based on the normal model **without** accounting for batch effects on the phenotype under a logit transformation.



Logit Phagocytes %

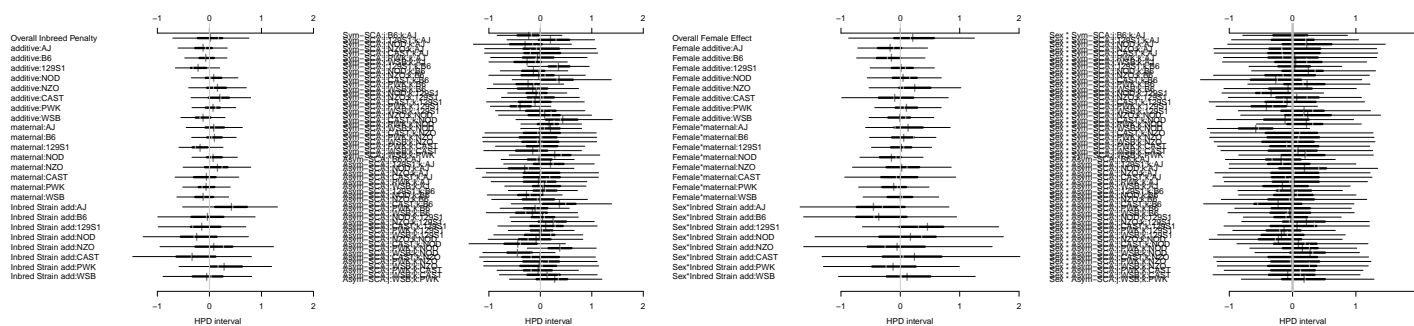

Figure 22.3: Diallel effects based on the normal model **accounting for batch** effects on the phenotype under a logit transformation.

## Chapter 23

# MZB.Pct.CD19: Marginal Zone B-cells

### 23.1 Data collected on MZB.Pct.CD19

Description: Marginal Zone B-cells

Transformation: INT. Rationale for transformation: Although natural range is between 0 and 1, outliers and small sample size make a logit transformation unstable for subsequent Gaussian-based analysis. Therefore, the inverse normal transformation using the Bliss correction is used instead.

Table 23.1: Number of mice phenotyped for MZB.Pct.CD19

|         | AJ | B6 | 129S1 | NOD | NZO | CAST | PWK | WSB | F1  | PreCC | Total |
|---------|----|----|-------|-----|-----|------|-----|-----|-----|-------|-------|
| Female  | 4  | 4  | 4     | 0   | 0   | 0    | 3   | 2   | 51  | 0     | 68    |
| Male    | 2  | 6  | 2     | 6   | 10  | 2    | 6   | 8   | 81  | 40    | 163   |
| Unsexed | 0  | 58 | 0     | 0   | 0   | 0    | 0   | 0   | 0   | 0     | 58    |
| Total   | 6  | 68 | 6     | 6   | 10  | 2    | 9   | 10  | 132 | 40    | 289   |

### 23.2 Raw and Transformed Data

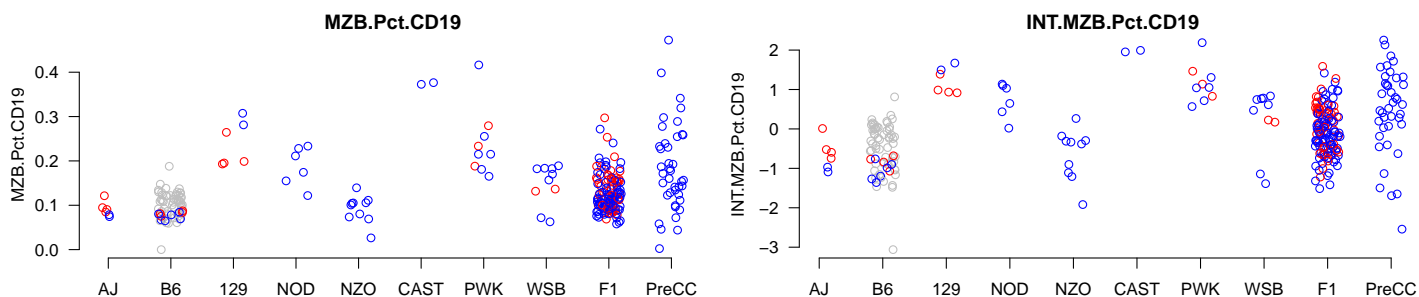

Figure 23.1: Phenotype values: raw and transformed for analysis for founder, F1 hybrid and PreCC mice. Colors distinguish females (red), males (blue), and unsexed (gray) mice.

Table 23.2: Point estimates. Upper table portion: mean and range statistics for raw phenotype values. Lower table portion: strain means and 95% CI on the transformed scale, as estimated from a linear model that includes a random intercept modeling the effects of 56 batches.

|                     | AJ      | B6     | 129S1  | NOD    | NZO     | CAST   | PWK    | WSB    | F1      | PreCC   |
|---------------------|---------|--------|--------|--------|---------|--------|--------|--------|---------|---------|
| Mean                | 0.0908  | 0.0978 | 0.24   | 0.187  | 0.0916  | 0.375  | 0.239  | 0.147  | 0.126   | 0.185   |
| SE of Mean          | 0.00686 | 0.0034 | 0.0206 | 0.0181 | 0.00972 | 0.0019 | 0.0253 | 0.0147 | 0.00372 | 0.0156  |
| Min                 | 0.0744  | 0      | 0.193  | 0.122  | 0.0264  | 0.373  | 0.165  | 0.0627 | 0.0578  | 0.00234 |
| Max                 | 0.122   | 0.188  | 0.307  | 0.233  | 0.139   | 0.376  | 0.416  | 0.189  | 0.297   | 0.472   |
| Modeled 95%CI Lower | -1.18   | -0.686 | 0.535  | 0.16   | -1.05   | 0.557  | 0.564  | -0.29  | -0.191  | 0.17    |
| Modeled Mean        | -0.604  | -0.512 | 1.1    | 0.78   | -0.584  | 1.53   | 1.07   | 0.173  | -0.045  | 0.46    |
| Modeled 95%CI Upper | -0.0305 | -0.338 | 1.67   | 1.4    | -0.119  | 2.5    | 1.57   | 0.636  | 0.101   | 0.751   |

Table 23.3: Sequential ANOVA table of strain and sex effects, controlling for batch, in the sexed subset of tested inbred strains.

|               | numerator df | denominator df | F-value | p-value  |
|---------------|--------------|----------------|---------|----------|
| Sex           | 1            | 38             | 0.598   | 0.444    |
| Inbred Strain | 7            | 38             | 18.1    | 2.56e-10 |

### 23.3 Diallel analysis

Diallel analysis including batch effects and Bayesian imputation of missing sex assignments was performed as described in Methods. This diallel arose as a byproduct of another experiment, and suboptimal pairing of batches with F1 hybrid groups in the experimental design means that incorporating batch effects greatly increases uncertainty about estimated genetic parameters.

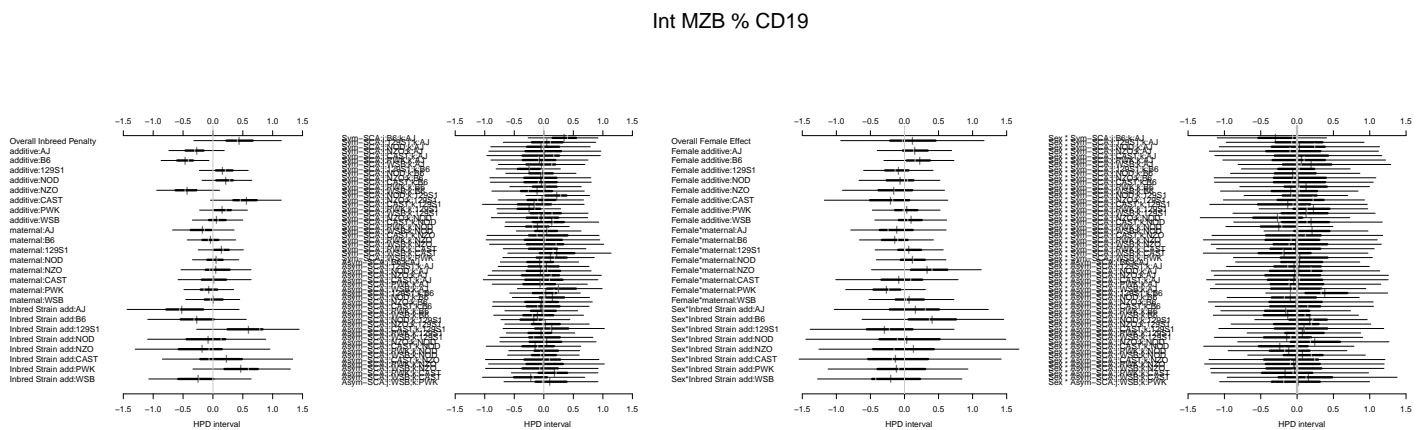

Figure 23.2: Diallel effects based on the normal model **without** accounting for batch effects on the phenotype under a INT transformation.

Int MZB % CD19

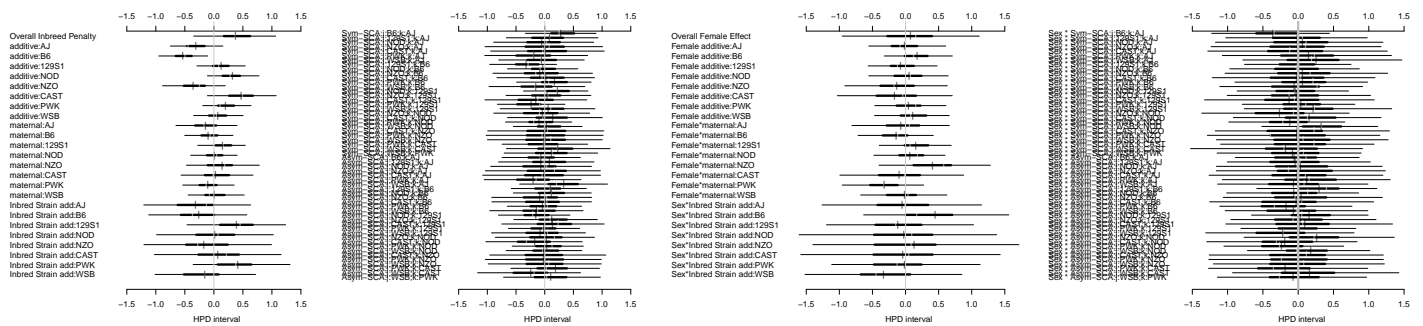

Figure 23.3: Diallel effects based on the normal model **accounting for batch** effects on the phenotype under a INT transformation.

# Chapter 24

## TransB.Pct.CD19: Transitional B-cells

### 24.1 Data collected on TransB.Pct.CD19

Description: Transitional B-cells

Transformation: INT. Rationale for transformation: Although natural range is between 0 and 1, outliers and small sample size make a logit transformation unstable for subsequent Gaussian-based analysis. Therefore, the inverse normal transformation using the Bliss correction is used instead.

Table 24.1: Number of mice phenotyped for TransB.Pct.CD19

|         | AJ | B6 | 129S1 | NOD | NZO | CAST | PWK | WSB | F1  | PreCC | Total |
|---------|----|----|-------|-----|-----|------|-----|-----|-----|-------|-------|
| Female  | 4  | 4  | 4     | 0   | 0   | 0    | 3   | 2   | 51  | 0     | 68    |
| Male    | 2  | 6  | 2     | 6   | 10  | 2    | 6   | 8   | 81  | 40    | 163   |
| Unsexed | 0  | 58 | 0     | 0   | 0   | 0    | 0   | 0   | 0   | 0     | 58    |
| Total   | 6  | 68 | 6     | 6   | 10  | 2    | 9   | 10  | 132 | 40    | 289   |

### 24.2 Raw and Transformed Data

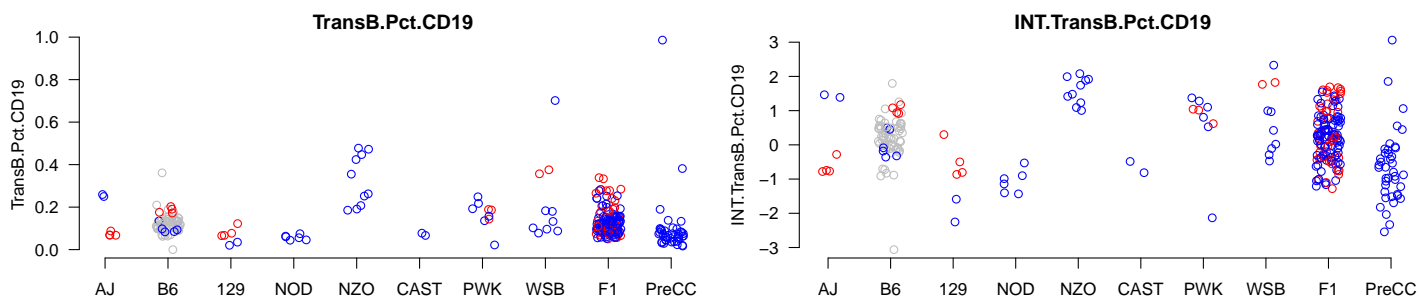

Figure 24.1: Phenotype values: raw and transformed for analysis for founder, F1 hybrid and PreCC mice. Colors distinguish females (red), males (blue), and unsexed (gray) mice.

Table 24.2: Point estimates. Upper table portion: mean and range statistics for raw phenotype values. Lower table portion: strain means and 95% CI on the transformed scale, as estimated from a linear model that includes a random intercept modeling the effects of 56 batches.

|                     | AJ     | B6      | 129S1  | NOD     | NZO    | CAST   | PWK     | WSB    | F1      | PreCC   |
|---------------------|--------|---------|--------|---------|--------|--------|---------|--------|---------|---------|
| Mean                | 0.134  | 0.123   | 0.0646 | 0.0574  | 0.328  | 0.0721 | 0.166   | 0.229  | 0.133   | 0.1     |
| SE of Mean          | 0.0384 | 0.00556 | 0.0145 | 0.00468 | 0.0382 | 0.0053 | 0.0215  | 0.0625 | 0.00546 | 0.0246  |
| Min                 | 0.0676 | 0       | 0.0204 | 0.0443  | 0.186  | 0.0668 | 0.0219  | 0.0778 | 0.0503  | 0.0169  |
| Max                 | 0.259  | 0.361   | 0.122  | 0.0749  | 0.478  | 0.0774 | 0.249   | 0.702  | 0.339   | 0.986   |
| Modeled 95%CI Lower | -0.577 | 0.00469 | -1.07  | -2.04   | 0.781  | -0.953 | -0.0623 | 0.0552 | 0.0236  | -0.781  |
| Modeled Mean        | 0.0156 | 0.212   | -0.492 | -1.32   | 1.28   | 0.0365 | 0.531   | 0.566  | 0.221   | -0.39   |
| Modeled 95%CI Upper | 0.608  | 0.419   | 0.0862 | -0.604  | 1.78   | 1.03   | 1.12    | 1.08   | 0.419   | 0.00156 |

Table 24.3: Sequential ANOVA table of strain and sex effects, controlling for batch, in the sexed subset of tested inbred strains.

|               | numerator df | denominator df | F-value | p-value  |
|---------------|--------------|----------------|---------|----------|
| Sex           | 1            | 38             | 0.602   | 0.443    |
| Inbred Strain | 7            | 38             | 6.52    | 4.45e-05 |

### 24.3 Diallel analysis

Diallel analysis including batch effects and Bayesian imputation of missing sex assignments was performed as described in Methods. This diallel arose as a byproduct of another experiment, and suboptimal pairing of batches with F1 hybrid groups in the experimental design means that incorporating batch effects greatly increases uncertainty about estimated genetic parameters.

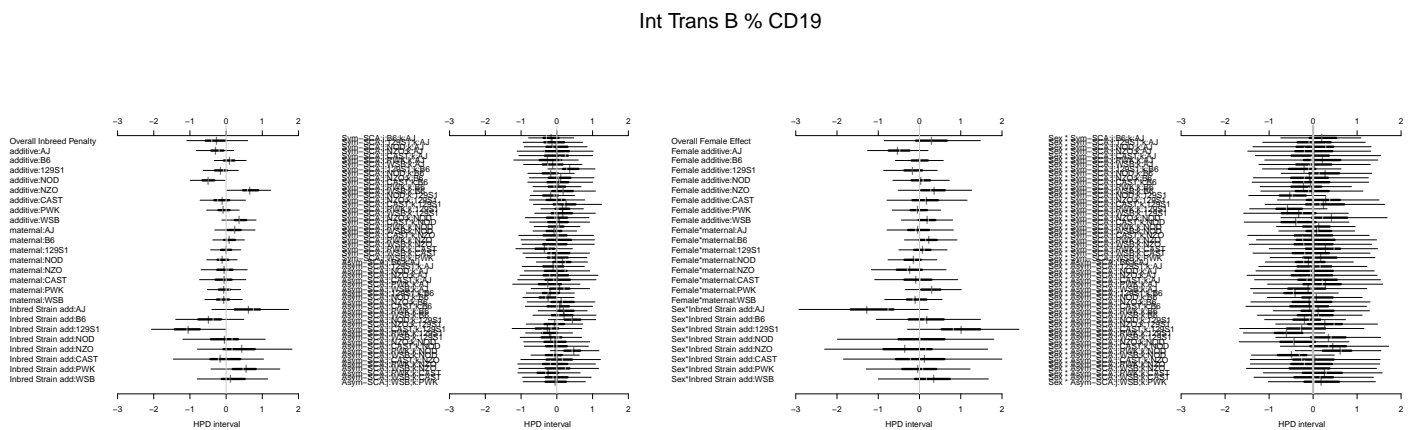

Figure 24.2: Diallel effects based on the normal model **without** accounting for batch effects on the phenotype under a INT transformation.

Int Trans B % CD19

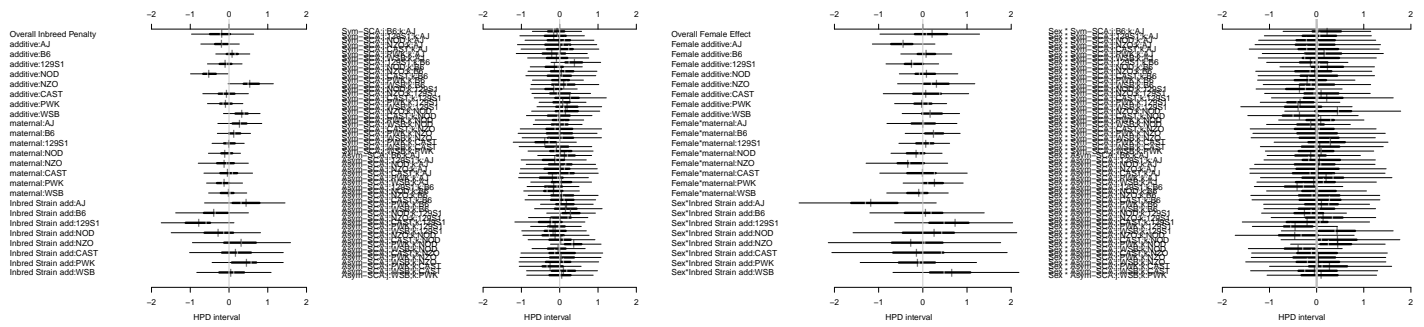

Figure 24.3: Diallel effects based on the normal model **accounting for batch** effects on the phenotype under a INT transformation.
